# Supplementary material for: A Ductal-Cell-Related Risk Model Integrating Single-Cell and Bulk Sequencing Data Predicts the Prognosis of Patients With Pancreatic Adenocarcinoma
Source: Front Genet. 2022 Jan 3;12:763636. doi: 10.3389/fgene.2021.763636 (PMC8762279; doi:10.3389/fgene.2021.763636)
Supplement: Supplementary file 1 [file Table1.XLS]

## Sheet: cluster_makers
Supplementary table1. The gene markers of different cell clusters
p_val	avg_log2FC	pct.1	pct.2	p_val_adj	cluster	gene
0	4.69262	0.87	0.232	0	0	RGS5
0	3.57732	0.971	0.518	0	0	ADIRF
0	3.5717	0.941	0.392	0	0	ACTA2
0	3.52769	0.959	0.404	0	0	TAGLN
0	3.49399	0.851	0.17	0	0	NDUFA4L2
0	3.38553	0.992	0.452	0	0	MYL9
0	2.82945	0.904	0.153	0	0	PDGFRB
0	2.79868	0.97	0.391	0	0	TPM2
0	2.6716	0.878	0.193	0	0	PPP1R14A
0	2.63059	0.998	0.553	0	0	CALD1
0	2.52566	0.625	0.056	0	0	HIGD1B
0	2.47931	0.865	0.175	0	0	NOTCH3
0	2.44656	0.534	0.05	0	0	MYH11
0	2.38455	1	0.893	0	0	IGFBP7
0	2.38264	0.787	0.192	0	0	CSRP2
0	2.32467	0.865	0.17	0	0	MAP1B
0	2.29728	0.8	0.216	0	0	GPX3
0	2.27683	0.876	0.225	0	0	MFGE8
0	2.26482	0.879	0.435	0	0	CRIP1
0	2.18929	0.654	0.05	0	0	COX4I2
0	2.11299	0.828	0.207	0	0	PLAC9
0	2.11071	0.8	0.286	0	0	PHLDA1
0	2.10658	0.838	0.21	0	0	LHFPL6
0	2.06729	0.748	0.212	0	0	C11orf96
0	2.00909	0.985	0.502	0	0	SPARCL1
0	2.00103	0.73	0.119	0	0	FRZB
0	1.98348	0.739	0.168	0	0	MYLK
0	1.96883	0.729	0.23	0	0	IGFBP5
0	1.95469	0.669	0.084	0	0	GJA4
0	1.94427	0.419	0.127	0	0	RASD1
0	1.93246	0.438	0.047	0	0	PLN
0	1.90401	0.678	0.161	0	0	PTP4A3
0	1.85821	0.562	0.157	0	0	FABP4
0	1.84252	0.743	0.332	0	0	COL4A1
0	1.83324	0.91	0.266	0	0	BGN
0	1.82527	0.94	0.412	0	0	SOD3
0	1.80922	0.701	0.184	0	0	ADAMTS1
0	1.79543	0.675	0.098	0	0	SEPTIN4
0	1.79035	0.807	0.443	0	0	ID3
0	1.78331	0.708	0.148	0	0	CRISPLD2
0	1.77428	0.689	0.159	0	0	MCAM
0	1.75767	0.665	0.233	0	0	TPPP3
0	1.72615	0.761	0.332	0	0	COL4A2
0	1.70567	0.588	0.067	0	0	PGF
0	1.70226	0.311	0.016	0	0	RERGL
0	1.67382	0.852	0.474	0	0	COL18A1
0	1.65468	0.842	0.391	0	0	CAVIN3
0	1.61424	0.641	0.346	0	0	PDK4
0	1.60024	0.823	0.402	0	0	TINAGL1
0	1.55704	0.855	0.305	0	0	COL6A2
0	1.55343	0.542	0.201	0	0	THY1
0	1.53549	0.541	0.121	0	0	ADAMTS4
0	1.51145	0.931	0.574	0	0	SELENOM
0	1.48656	0.39	0.068	0	0	STEAP4
0	1.47123	0.66	0.395	0	0	MT1M
0	1.46753	0.993	0.919	0	0	MT2A
0	1.46001	0.95	0.565	0	0	SPARC
0	1.4566	0.271	0.036	0	0	ACTG2
0	1.44919	0.457	0.063	0	0	MAP3K7CL
0	1.44816	0.772	0.324	0	0	CPE
0	1.43434	0.965	0.831	0	0	DSTN
0	1.42102	0.364	0.136	0	0	MT1A
0	1.4201	0.751	0.326	0	0	NR2F2
0	1.41796	0.657	0.48	0	0	GADD45B
0	1.41344	0.684	0.271	0	0	MTHFD2
0	1.40491	0.795	0.302	0	0	COX7A1
0	1.4006	0.528	0.16	0	0	ASPN
0	1.39552	0.586	0.1	0	0	SMOC2
0	1.39188	0.95	0.8	0	0	TIMP1
0	1.38644	0.75	0.409	0	0	OAZ2
0	1.38412	0.605	0.124	0	0	NEXN
0	1.3835	0.593	0.089	0	0	COL14A1
0	1.34364	0.788	0.462	0	0	FLNA
0	1.34058	0.514	0.056	0	0	SYNPO2
0	1.32466	0.509	0.05	0	0	HEYL
0	1.32053	0.554	0.096	0	0	C1QTNF1
0	1.31291	0.689	0.231	0	0	PCOLCE
0	1.30252	0.894	0.633	0	0	TSC22D1
0	1.29698	0.994	0.755	0	0	VIM
0	1.28209	0.913	0.666	0	0	SEPTIN7
0	1.27003	0.452	0.082	0	0	CHN1
0	1.26795	0.577	0.252	0	0	LBH
0	1.26642	0.401	0.044	0	0	KCNJ8
0	1.2618	0.63	0.205	0	0	EHD2
0	1.25948	0.457	0.028	0	0	ENPEP
0	1.25665	0.49	0.065	0	0	KCNE4
0	1.24921	0.462	0.037	0	0	TBX2
0	1.24497	0.313	0.019	0	0	EGFL6
0	1.23523	0.415	0.066	0	0	PLXDC1
0	1.23479	0.536	0.121	0	0	FXYD1
0	1.23344	0.639	0.243	0	0	MAP3K20
0	1.23296	0.621	0.258	0	0	SDC2
0	1.22785	0.424	0.043	0	0	CCDC102B
0	1.22552	0.597	0.205	0	0	CRYAB
0	1.22178	0.752	0.335	0	0	C1R
0	1.22004	0.446	0.041	0	0	LMOD1
0	1.20901	0.445	0.178	0	0	SNCG
0	1.20292	0.632	0.374	0	0	TFPI
0	1.20083	0.86	0.454	0	0	CAV1
0	1.19508	0.422	0.019	0	0	FAM162B
0	1.17948	0.979	0.836	0	0	IFITM2
0	1.17569	0.625	0.276	0	0	FILIP1L
0	1.16984	0.444	0.036	0	0	GJC1
0	1.16439	0.431	0.045	0	0	ANGPT2
0	1.15972	0.609	0.196	0	0	TGFB1I1
0	1.15692	0.992	0.732	0	0	LGALS1
0	1.14468	0.546	0.119	0	0	DKK3
0	1.14284	0.759	0.282	0	0	SERPINF1
0	1.14281	0.496	0.2	0	0	CPM
0	1.12055	0.975	0.646	0	0	MGP
0	1.11557	0.466	0.074	0	0	ADCY3
0	1.11349	0.55	0.116	0	0	EBF1
0	1.10756	0.884	0.662	0	0	SH3BGRL
0	1.10735	0.925	0.732	0	0	ITGB1
0	1.10512	0.448	0.029	0	0	EFHD1
0	1.10397	0.481	0.165	0	0	FHL1
0	1.09512	0.315	0.054	0	0	CNN1
0	1.09339	0.455	0.082	0	0	RCAN2
0	1.09097	0.726	0.317	0	0	COL6A1
0	1.09016	0.687	0.338	0	0	EPS8
0	1.08951	0.882	0.788	0	0	JUNB
0	1.08799	0.427	0.041	0	0	CDH6
0	1.08664	0.91	0.528	0	0	IGFBP4
0	1.07958	0.442	0.04	0	0	PTGIR
0	1.05839	0.999	0.923	0	0	IFITM3
0	1.05617	0.609	0.414	0	0	CSRP1
0	1.05222	0.498	0.137	0	0	AXL
0	1.03157	0.407	0.062	0	0	SLIT3
0	1.03142	0.699	0.373	0	0	ARID5B
0	1.02908	0.379	0.036	0	0	FOXS1
0	1.01643	0.415	0.061	0	0	HOXB-AS1
0	1.01215	0.791	0.576	0	0	CEBPD
0	1.0047	0.411	0.069	0	0	KLHL23
0	0.999044	0.438	0.12	0	0	NID1
0	0.995534	0.282	0.056	0	0	COLEC11
0	0.993038	0.358	0.023	0	0	LGI4
0	0.990006	0.616	0.256	0	0	ANXA6
0	0.986489	0.579	0.264	0	0	TNS1
0	0.981413	0.362	0.061	0	0	CCDC3
0	0.973333	0.389	0.032	0	0	ITGA7
0	0.969476	0.613	0.337	0	0	PTEN
0	0.959694	0.326	0.033	0	0	SLC38A11
0	0.957109	0.696	0.33	0	0	C1S
0	0.939307	0.385	0.074	0	0	HSPB6
0	0.934655	0.77	0.393	0	0	CAVIN1
0	0.931736	0.86	0.604	0	0	PTMS
0	0.931548	0.524	0.22	0	0	FBLIM1
0	0.931495	0.64	0.292	0	0	MEF2C
0	0.929634	0.442	0.102	0	0	GUCY1B1
0	0.903366	0.9	0.48	0	0	A2M
0	0.900265	0.641	0.387	0	0	PPP1R12A
0	0.899864	0.408	0.081	0	0	FILIP1
0	0.897805	0.682	0.499	0	0	LPP
0	0.882925	0.391	0.097	0	0	PPP1R12B
0	0.882487	0.897	0.636	0	0	SERPING1
0	0.877996	0.279	0.017	0	0	KCNK17
0	0.874855	0.441	0.127	0	0	RERG
0	0.869135	0.388	0.073	0	0	PARM1
0	0.866527	0.3	0.067	0	0	SERPINI1
0	0.863981	0.535	0.233	0	0	ITGA1
0	0.858074	0.719	0.51	0	0	APOE
0	0.8526	0.389	0.1	0	0	AOC3
0	0.846385	0.47	0.2	0	0	INAFM1
0	0.845023	0.552	0.3	0	0	UBA2
0	0.841223	0.339	0.06	0	0	GPR4
0	0.839218	0.386	0.122	0	0	GEM
0	0.838733	0.465	0.151	0	0	GUCY1A1
0	0.838214	0.467	0.145	0	0	ZEB2
0	0.836084	0.407	0.108	0	0	ARHGAP15
0	0.83329	0.628	0.365	0	0	NDRG2
0	0.832154	0.681	0.394	0	0	HES4
0	0.831259	0.462	0.176	0	0	HOPX
0	0.830466	0.506	0.25	0	0	JAG1
0	0.830375	0.385	0.077	0	0	ARHGEF17
0	0.827356	0.297	0.028	0	0	MIR145
0	0.821203	0.403	0.198	0	0	C20orf27
0	0.815421	0.717	0.437	0	0	IFITM1
0	0.815339	0.445	0.161	0	0	KANK2
0	0.813546	0.375	0.086	0	0	ADGRA2
0	0.811201	0.363	0.093	0	0	TMEM38B
0	0.811031	0.413	0.138	0	0	LAMA4
0	0.80245	0.328	0.091	0	0	OLFML2A
0	0.798903	0.426	0.134	0	0	MSRB3
0	0.794034	0.372	0.063	0	0	EDNRA
0	0.793484	0.3	0.014	0	0	FHL5
0	0.789013	0.289	0.032	0	0	CSPG4
0	0.786053	0.459	0.157	0	0	NDN
0	0.782983	0.885	0.611	0	0	CNN3
0	0.782585	0.377	0.098	0	0	PTN
0	0.780988	0.325	0.034	0	0	PRR16
0	0.779864	0.409	0.173	0	0	GGT5
0	0.779379	0.33	0.037	0	0	IRAG1
0	0.778539	0.783	0.479	0	0	LDHB
0	0.773823	0.511	0.176	0	0	AKAP12
0	0.773609	0.313	0.077	0	0	CD248
0	0.767191	0.374	0.086	0	0	EDNRB
0	0.765616	0.623	0.404	0	0	FKBP5
0	0.763316	0.416	0.167	0	0	FXYD6
0	0.759516	0.307	0.129	0	0	CYGB
0	0.758675	0.998	0.987	0	0	MYL6
0	0.753481	0.888	0.763	0	0	MGST3
0	0.749282	0.37	0.093	0	0	FAM13C
0	0.7488	0.325	0.071	0	0	SLC7A2
0	0.743513	0.53	0.24	0	0	APOLD1
0	0.740306	0.264	0.035	0	0	ABCC9
0	0.738894	0.282	0.019	0	0	SGCA
0	0.738888	0.655	0.478	0	0	HCFC1R1
0	0.737502	0.909	0.743	0	0	TPM1
0	0.737283	0.821	0.664	0	0	TPM4
0	0.735701	0.275	0.024	0	0	LZTS1
0	0.729558	0.601	0.371	0	0	RBPMS
0	0.728798	0.545	0.298	0	0	PKIG
0	0.727433	0.328	0.138	0	0	PDGFA
0	0.724308	0.926	0.844	0	0	EIF4A1
0	0.723136	0.295	0.069	0	0	RNF152
0	0.72089	0.329	0.066	0	0	ECM2
0	0.712849	0.388	0.145	0	0	SMTN
0	0.711918	0.889	0.703	0	0	LMNA
0	0.710921	0.3	0.032	0	0	NFASC
0	0.71091	0.475	0.271	0	0	PTK2
0	0.703485	0.927	0.797	0	0	EID1
0	0.701595	0.994	0.957	0	0	CALM2
0	0.70054	0.556	0.342	0	0	RSU1
0	0.698254	0.279	0.07	0	0	OLFML2B
0	0.685882	0.349	0.157	0	0	LTBP1
0	0.685016	0.299	0.066	0	0	PLCE1
0	0.684884	0.711	0.51	0	0	CYB5R3
0	0.682066	0.721	0.428	0	0	STOM
0	0.676672	0.258	0.032	0	0	MRGPRF
0	0.675478	0.516	0.303	0	0	PDLIM7
0	0.673593	0.405	0.179	0	0	ADAMTS9
0	0.673185	0.529	0.268	0	0	PALLD
0	0.673067	0.27	0.014	0	0	RASL12
0	0.66734	0.746	0.439	0	0	NNMT
0	0.664597	0.602	0.386	0	0	SERPINH1
0	0.664528	0.292	0.038	0	0	HSPB2
0	0.662767	0.446	0.236	0	0	CLMN
0	0.659333	0.86	0.701	0	0	C12orf57
0	0.658914	0.823	0.565	0	0	CRIP2
0	0.658243	0.803	0.452	0	0	TIMP3
0	0.655212	1	0.998	0	0	PTMA
0	0.654529	0.348	0.115	0	0	MAP7D3
0	0.654279	0.273	0.064	0	0	TCF21
0	0.647344	0.267	0.028	0	0	ANGPT1
0	0.639713	1	1	0	0	MALAT1
0	0.636497	0.532	0.326	0	0	CRTAP
0	0.634042	0.771	0.6	0	0	CHCHD10
0	0.62848	0.287	0.04	0	0	PDE1A
0	0.624759	0.281	0.052	0	0	ADAP2
0	0.624226	0.469	0.225	0	0	TGFBI
0	0.622548	0.322	0.118	0	0	ZNF703
0	0.616254	0.309	0.092	0	0	GUCY1A2
0	0.612525	0.33	0.096	0	0	DDR2
0	0.607988	0.349	0.166	0	0	MAPRE2
0	0.603658	0.37	0.15	0	0	TMEM47
0	0.600966	0.435	0.205	0	0	RAB34
0	0.600787	0.315	0.097	0	0	NEURL1B
0	0.589953	0.261	0.063	0	0	KCNMB1
0	0.589481	0.88	0.75	0	0	SELENOW
0	0.58539	0.256	0.038	0	0	MOCS1
0	0.580824	0.291	0.081	0	0	GRK5
0	0.576338	0.26	0.057	0	0	NR2F2-AS1
0	0.574508	0.277	0.108	0	0	NIBAN1
0	0.565781	0.432	0.191	0	0	ID4
0	0.545763	0.597	0.237	0	0	AEBP1
0	0.53632	0.268	0.087	0	0	VASN
0	0.524875	0.276	0.099	0	0	RGS16
0	0.519974	0.478	0.184	0	0	COL5A2
0	0.519903	0.451	0.209	0	0	C1orf54
0	0.513514	0.266	0.09	0	0	PLEKHA4
0	0.512576	0.765	0.412	0	0	EPAS1
0	0.507513	0.272	0.105	0	0	SNAI2
0	0.506728	0.296	0.097	0	0	PRRX1
0	0.493977	0.808	0.374	0	0	COL3A1
0	0.493749	0.272	0.081	0	0	RASGRP2
0	0.485464	0.362	0.144	0	0	ADGRF5
0	0.482384	0.957	0.907	0	0	DDX5
0	0.469846	0.268	0.099	0	0	ANO1
0	0.447766	0.322	0.123	0	0	EMILIN1
0	0.441385	0.727	0.462	0	0	NUPR1
0	0.414425	0.329	0.126	0	0	ANTXR1
0	0.411954	0.363	0.15	0	0	MXRA8
0	0.408046	0.979	0.957	0	0	EEF1D
0	0.367993	0.598	0.346	0	0	FN1
0	0.334379	1	0.993	0	0	ACTB
5.35323e-307	0.59143	0.739	0.612	9.10263e-303	0	SBDS
1.64779e-305	0.411806	0.957	0.907	2.8019e-301	0	SKP1
3.45863e-305	0.559939	0.524	0.303	5.88105e-301	0	FSTL1
9.51776e-304	0.635812	0.527	0.344	1.6184e-299	0	TLN1
5.29235e-302	0.67517	0.376	0.187	8.99911e-298	0	FBXO32
1.64603e-299	0.374028	0.294	0.116	2.79891e-295	0	PRELP
1.68461e-299	0.576052	0.734	0.613	2.86452e-295	0	AP2M1
1.50072e-298	0.355402	0.286	0.111	2.55182e-294	0	SRPX
6.16138e-298	0.674122	0.46	0.275	1.04768e-293	0	MYO1B
4.70302e-297	0.542859	0.335	0.157	7.99702e-293	0	KIAA0040
1.37941e-295	0.995129	0.527	0.327	2.34555e-291	0	PHLDA2
2.51002e-295	0.716842	0.444	0.263	4.26805e-291	0	ZFHX3
1.46226e-294	0.473615	0.314	0.138	2.48643e-290	0	A1BG
4.63279e-292	0.50104	0.529	0.301	7.8776e-288	0	ISYNA1
6.28426e-291	0.44698	0.951	0.901	1.06858e-286	0	SLC25A6
2.23266e-288	0.573677	0.359	0.185	3.79642e-284	0	B3GNT2
7.37397e-286	0.470742	0.418	0.213	1.25387e-281	0	DLC1
6.74625e-284	0.556631	0.706	0.56	1.14713e-279	0	ESD
5.27396e-274	0.445422	0.279	0.119	8.96784e-270	0	CALHM2
8.90868e-274	0.461989	0.296	0.13	1.51483e-269	0	PDE5A
6.90059e-270	0.600317	0.424	0.227	1.17338e-265	0	PDLIM3
6.19986e-264	0.66289	0.605	0.445	1.05422e-259	0	ACTN1
5.04817e-263	0.307945	0.447	0.224	8.58392e-259	0	ESAM
1.40788e-262	0.459494	0.352	0.173	2.39395e-258	0	FKBP10
1.96936e-262	0.396747	0.361	0.172	3.34871e-258	0	LRRC32
2.89385e-259	0.617081	0.453	0.28	4.92069e-255	0	LAMC1
5.0038e-258	0.586456	0.507	0.305	8.50847e-254	0	CAMK2N1
2.06526e-257	0.674629	0.592	0.423	3.51176e-253	0	NUDT4
3.52718e-256	0.705243	0.603	0.461	5.99762e-252	0	ARPC1A
2.7302e-253	0.490901	0.334	0.165	4.64243e-249	0	HOXB2
1.93046e-247	0.826183	0.531	0.364	3.28255e-243	0	NR4A1
1.75357e-246	0.477146	0.329	0.166	2.98177e-242	0	CFL2
2.86039e-246	0.585052	0.487	0.319	4.8638e-242	0	LAMB2
4.09788e-246	0.491938	0.372	0.197	6.96803e-242	0	FERMT2
9.94555e-237	0.447707	0.817	0.715	1.69114e-232	0	BSG
3.70582e-234	0.614916	0.415	0.247	6.30137e-230	0	CBX6
2.77062e-231	0.342048	0.974	0.894	4.71117e-227	0	HSPB1
2.84057e-230	0.579813	0.32	0.171	4.8301e-226	0	GPRC5C
6.10522e-229	0.516824	0.752	0.633	1.03813e-224	0	MYH9
9.46942e-227	0.374251	0.985	0.931	1.61018e-222	0	CD63
3.37218e-226	0.534632	0.557	0.389	5.73406e-222	0	KLF9
1.06916e-225	0.285332	0.996	0.982	1.81799e-221	0	RPL10A
5.04252e-225	0.851789	0.688	0.566	8.5743e-221	0	RHOB
1.17717e-223	0.595596	0.594	0.432	2.00166e-219	0	ATP1B3
4.43546e-223	0.625199	0.419	0.242	7.54205e-219	0	THBS1
1.06259e-220	0.502003	0.576	0.431	1.80683e-216	0	SPTSSA
1.43864e-220	0.683099	0.468	0.321	2.44626e-216	0	AK1
2.49274e-217	0.508191	0.761	0.611	4.23865e-213	0	BST2
7.39729e-214	0.562647	0.62	0.459	1.25783e-209	0	TUBA1A
4.91719e-209	0.768216	0.302	0.149	8.36119e-205	0	MFAP4
5.25124e-207	0.50467	0.354	0.206	8.92921e-203	0	ARHGAP1
5.59981e-207	0.343248	0.946	0.914	9.52191e-203	0	EEF2
1.94579e-205	0.464132	0.307	0.163	3.30863e-201	0	TWSG1
9.41624e-205	0.438748	0.388	0.219	1.60114e-200	0	TNS2
3.41529e-204	0.297586	0.994	0.982	5.80736e-200	0	H3-3B
9.20336e-204	0.56485	0.342	0.199	1.56494e-199	0	NOL3
2.5019e-203	0.475607	0.762	0.644	4.25423e-199	0	CD151
1.34688e-202	0.687772	0.775	0.645	2.29023e-198	0	S100A4
1.20791e-201	0.451568	0.744	0.645	2.05393e-197	0	YWHAQ
2.99102e-201	0.504678	0.689	0.59	5.08593e-197	0	CHURC1
1.13936e-199	0.372806	0.283	0.139	1.93737e-195	0	ECM1
6.58716e-199	0.338106	0.951	0.916	1.12008e-194	0	YBX1
1.26041e-198	0.583044	0.444	0.282	2.1432e-194	0	IGFBP6
3.65663e-196	0.546778	0.438	0.298	6.21773e-192	0	HMOX2
4.68599e-196	0.435805	0.418	0.253	7.96806e-192	0	LURAP1L
8.00727e-194	0.51451	0.702	0.568	1.36156e-189	0	LGALS3BP
1.12106e-193	0.434327	0.255	0.122	1.90625e-189	0	PAG1
2.65065e-193	0.938008	0.537	0.389	4.50717e-189	0	IGFBP2
1.62883e-192	0.374	0.938	0.885	2.76967e-188	0	COX7A2
2.24337e-190	0.562448	0.873	0.725	3.81462e-186	0	MT1E
1.85825e-188	0.546234	0.297	0.162	3.15976e-184	0	PROCR
1.31239e-187	0.436057	0.314	0.173	2.23158e-183	0	SSBP2
5.51767e-187	0.51183	0.576	0.447	9.38225e-183	0	MAGED2
4.04326e-185	0.3607	0.28	0.139	6.87515e-181	0	RBMS3
1.96697e-183	0.50351	0.423	0.275	3.34463e-179	0	SEPTIN11
1.32001e-182	0.399103	0.283	0.147	2.24455e-178	0	ST6GALNAC6
1.42115e-182	0.498425	0.702	0.582	2.41652e-178	0	YBX3
7.16667e-182	0.488338	0.295	0.163	1.21862e-177	0	SORT1
3.57263e-181	0.34602	0.391	0.223	6.07491e-177	0	RAB31
4.71428e-181	0.459515	0.676	0.577	8.01617e-177	0	RWDD1
1.36737e-177	0.517062	0.518	0.374	2.32507e-173	0	EPHX1
2.02751e-177	0.472073	0.485	0.343	3.44757e-173	0	NME4
1.89729e-176	0.474045	0.487	0.352	3.22615e-172	0	RTL8C
8.48748e-176	0.29262	0.411	0.236	1.44321e-171	0	TMEM204
4.63004e-173	0.401343	0.828	0.741	7.87293e-169	0	PNRC1
1.19158e-170	0.483354	0.534	0.394	2.02617e-166	0	PLS3
7.5616e-170	0.49098	0.557	0.439	1.28577e-165	0	ROCK1
1.18847e-168	0.412801	0.699	0.579	2.02087e-164	0	H2AJ
1.26989e-168	0.335003	0.872	0.808	2.15932e-164	0	NAP1L1
8.92891e-168	0.389276	0.318	0.181	1.51827e-163	0	UBE2E2
8.21891e-167	0.289495	0.958	0.92	1.39754e-162	0	SUMO2
3.57901e-164	0.388068	0.454	0.284	6.08575e-160	0	PMP22
4.4745e-164	0.512083	0.413	0.284	7.60845e-160	0	VCL
9.81633e-162	0.369222	0.378	0.221	1.66917e-157	0	CLEC11A
1.13386e-161	0.468134	0.627	0.538	1.92802e-157	0	PRKAR1A
1.33728e-160	0.599583	0.492	0.384	2.2739e-156	0	CCDC107
1.37104e-159	0.394404	0.75	0.655	2.33132e-155	0	VAMP2
7.51108e-157	0.299331	0.91	0.835	1.27718e-152	0	LAPTM4A
3.63673e-155	0.581985	0.48	0.332	6.1839e-151	0	BCAM
1.01872e-154	0.443774	0.278	0.158	1.73224e-150	0	MEF2D
3.61237e-154	0.428486	0.461	0.319	6.14248e-150	0	SCPEP1
5.3422e-153	0.473168	0.447	0.295	9.08387e-149	0	ZBTB16
4.69456e-151	0.527318	0.303	0.183	7.98264e-147	0	SNHG15
4.11772e-150	0.424718	0.281	0.16	7.00177e-146	0	ARHGEF7
4.8324e-150	0.363211	0.679	0.538	8.21701e-146	0	CAV2
5.87052e-144	0.290528	0.952	0.917	9.98223e-140	0	COX6C
3.39868e-143	0.343979	0.826	0.775	5.77912e-139	0	SLC25A3
4.98338e-143	0.339171	0.34	0.193	8.47374e-139	0	NTRK2
5.26721e-143	0.432843	0.288	0.17	8.95637e-139	0	SLCO3A1
9.24134e-143	0.46823	0.423	0.302	1.5714e-138	0	MPRIP
2.1773e-141	0.470355	0.535	0.437	3.70227e-137	0	ILK
2.818e-138	0.545305	0.707	0.635	4.79172e-134	0	CYCS
8.98888e-138	0.580105	0.38	0.25	1.52847e-133	0	MYC
1.93675e-136	0.318147	0.853	0.818	3.29325e-132	0	ARPC2
4.57541e-136	0.579218	0.691	0.62	7.78003e-132	0	PPP1CB
6.18751e-136	0.368807	0.499	0.364	1.05212e-131	0	ITM2C
1.15776e-135	0.430113	0.506	0.388	1.96865e-131	0	RBMS1
1.71293e-135	0.41282	0.5	0.381	2.91266e-131	0	CALU
2.71765e-135	0.305706	0.921	0.868	4.6211e-131	0	DYNLL1
2.5502e-134	0.281328	0.717	0.603	4.33636e-130	0	PDLIM1
1.25658e-133	0.436458	0.455	0.339	2.1367e-129	0	OAT
1.63997e-131	0.331656	0.695	0.575	2.78861e-127	0	ARHGDIB
5.25445e-131	0.408439	0.385	0.257	8.93467e-127	0	PDLIM2
5.53715e-130	0.38426	0.263	0.152	9.41537e-126	0	RHOQ
3.56921e-127	0.422296	0.4	0.289	6.06908e-123	0	ARL3
9.88319e-127	0.364658	0.254	0.144	1.68054e-122	0	SYTL2
4.25769e-125	0.386706	0.508	0.385	7.23978e-121	0	MYADM
5.12535e-124	0.406825	0.416	0.302	8.71514e-120	0	DEGS1
3.53701e-123	0.371329	0.291	0.179	6.01434e-119	0	CRTC3
7.43879e-123	0.366381	0.711	0.647	1.26489e-118	0	ISCU
1.90055e-121	0.424812	0.315	0.201	3.2317e-117	0	LTBP4
2.34316e-121	0.309388	0.788	0.696	3.9843e-117	0	RHOC
6.05614e-121	0.308898	0.26	0.148	1.02979e-116	0	FKBP7
3.20286e-120	0.486661	0.375	0.268	5.44614e-116	0	ENAH
8.18373e-120	0.488129	0.6	0.519	1.39156e-115	0	ZFAND5
5.11287e-119	0.403579	0.294	0.182	8.69393e-115	0	PROS1
4.22795e-117	0.314624	0.848	0.814	7.18921e-113	0	HNRNPDL
5.45725e-116	0.748857	0.541	0.464	9.27951e-112	0	CYTOR
5.91204e-115	0.412705	0.527	0.432	1.00528e-110	0	MAP1LC3A
6.44453e-115	0.450223	0.373	0.273	1.09583e-110	0	PACSIN2
7.50279e-115	0.363902	0.598	0.506	1.27578e-110	0	TNFRSF1A
8.65098e-115	0.323835	0.363	0.235	1.47101e-110	0	EFEMP2
2.56868e-113	0.382233	0.316	0.204	4.36779e-109	0	DNAJB4
5.5401e-113	0.362169	0.638	0.54	9.42038e-109	0	TCEAL4
1.13006e-112	0.346621	0.658	0.552	1.92155e-108	0	ISG15
4.89242e-112	0.340926	0.277	0.168	8.31907e-108	0	CCND2
5.83627e-112	0.263127	0.254	0.144	9.924e-108	0	GLIPR2
2.65017e-111	0.371056	0.335	0.229	4.50635e-107	0	PARVA
4.47371e-111	0.327009	0.256	0.151	7.6071e-107	0	CHSY1
5.69326e-111	0.32712	0.665	0.581	9.68082e-107	0	RAB13
6.36314e-111	0.27453	0.858	0.81	1.08199e-106	0	PARK7
6.50543e-110	0.304566	0.462	0.33	1.10618e-105	0	ARHGAP29
1.15841e-109	0.383132	0.563	0.484	1.96975e-105	0	RNASEH2C
1.48525e-109	0.695841	0.455	0.363	2.52552e-105	0	MIR4435-2HG
3.08084e-108	0.307779	0.774	0.667	5.23865e-104	0	CEBPB
9.55894e-108	0.328485	0.455	0.333	1.6254e-103	0	CLIC4
1.35229e-107	0.320995	0.339	0.221	2.29943e-103	0	SGCE
1.36303e-106	0.322544	0.792	0.739	2.31769e-102	0	NDUFB7
5.75678e-106	0.396195	0.266	0.167	9.78882e-102	0	BCL6
7.89205e-106	0.364966	0.322	0.213	1.34196e-101	0	EPB41L2
2.66973e-100	0.383723	0.418	0.31	4.53961e-96	0	UTRN
7.90126e-100	0.451228	0.324	0.226	1.34353e-95	0	TNFRSF21
3.8677e-98	0.312374	0.704	0.643	6.57664e-94	0	MRFAP1
2.1505e-97	0.383381	0.315	0.219	3.65671e-93	0	TLE1
1.27675e-94	0.356976	0.326	0.229	2.17099e-90	0	SORBS3
1.92321e-92	0.484698	0.339	0.251	3.27023e-88	0	SLC25A4
6.09068e-92	0.279285	0.813	0.781	1.03566e-87	0	BRK1
3.96362e-91	0.346735	0.366	0.263	6.73975e-87	0	ECE1
7.84743e-90	0.486508	0.368	0.285	1.33438e-85	0	PRXL2A
4.40296e-89	0.305394	0.698	0.648	7.48679e-85	0	RAB2A
1.11247e-88	0.262141	0.799	0.743	1.89164e-84	0	RABAC1
1.45776e-87	0.264158	0.81	0.771	2.47878e-83	0	NDUFA11
1.76319e-87	0.271262	0.826	0.788	2.99813e-83	0	CNBP
2.49005e-87	0.300377	0.764	0.726	4.23408e-83	0	C11orf58
1.08898e-86	0.298755	0.612	0.544	1.85171e-82	0	PGAM1
2.59755e-86	0.326964	0.335	0.237	4.41687e-82	0	CPQ
2.63045e-86	0.35151	0.798	0.745	4.47282e-82	0	VMP1
2.31231e-85	0.334738	0.283	0.192	3.93186e-81	0	TBC1D1
7.55343e-85	0.338462	0.301	0.208	1.28439e-80	0	C1orf21
8.21389e-85	0.356455	0.306	0.214	1.39669e-80	0	SELENBP1
1.02335e-82	0.345721	0.303	0.216	1.7401e-78	0	NT5C3B
4.24758e-82	0.370009	0.295	0.204	7.22259e-78	0	MYLIP
4.27146e-82	0.351096	0.447	0.373	7.26319e-78	0	DCTN2
1.74247e-81	0.342568	0.528	0.453	2.9629e-77	0	HIF1A
5.39573e-81	0.292152	0.609	0.55	9.17489e-77	0	ASAH1
4.60599e-80	0.299014	0.63	0.577	7.83203e-76	0	NDUFA5
3.10666e-79	0.267447	0.29	0.194	5.28257e-75	0	PTPRG
6.48294e-79	0.352595	0.317	0.233	1.10236e-74	0	NMD3
7.80904e-79	0.254107	0.779	0.743	1.32785e-74	0	PSMB1
3.29027e-78	0.298962	0.76	0.741	5.59478e-74	0	ATP5F1B
4.65809e-77	0.326009	0.63	0.577	7.92062e-73	0	CAMTA1
7.51164e-77	0.252502	0.7	0.649	1.27728e-72	0	SELENOK
1.42753e-76	0.389005	0.323	0.232	2.42737e-72	0	RND3
9.15312e-76	0.282385	0.646	0.589	1.5564e-71	0	LEPROT
1.00453e-75	0.271663	0.747	0.715	1.7081e-71	0	ARPC5
1.58601e-75	0.278748	0.646	0.592	2.69686e-71	0	PSMB6
4.79221e-75	0.273319	0.25	0.165	8.14868e-71	0	PRAF2
3.62785e-74	0.352049	0.455	0.39	6.16879e-70	0	MPG
4.00239e-74	0.337212	0.316	0.232	6.80566e-70	0	ROCK2
5.21758e-74	0.354881	0.252	0.17	8.87197e-70	0	NREP
9.22405e-71	0.342235	0.268	0.19	1.56846e-66	0	ABTB1
9.73544e-71	0.296477	0.316	0.228	1.65541e-66	0	PHLDB1
1.44932e-70	0.508927	0.397	0.325	2.46442e-66	0	UACA
2.14874e-70	0.260225	0.264	0.176	3.65371e-66	0	PLXND1
3.89665e-70	0.251766	0.72	0.677	6.62586e-66	0	SLC25A5
9.37983e-70	0.268082	0.402	0.305	1.59495e-65	0	NRP1
2.62812e-68	0.298285	0.449	0.376	4.46885e-64	0	RRAGA
1.02785e-67	0.337171	0.419	0.352	1.74775e-63	0	C5orf24
1.78385e-67	0.254539	0.668	0.611	3.03326e-63	0	NENF
5.13819e-67	0.315834	0.434	0.363	8.73698e-63	0	HDDC2
1.3484e-66	0.364542	0.467	0.411	2.29282e-62	0	ANKRD10
4.50007e-66	0.309018	0.543	0.496	7.65193e-62	0	PSMC3
3.09999e-65	0.296427	0.583	0.54	5.27123e-61	0	RAD23A
8.62483e-65	0.286722	0.62	0.576	1.46657e-60	0	PCNP
5.96045e-62	0.274972	0.586	0.544	1.01351e-57	0	RNH1
1.12493e-61	0.349063	0.346	0.269	1.91283e-57	0	JADE1
1.7143e-61	0.251861	0.578	0.498	2.915e-57	0	GAS6
2.58809e-61	0.268752	0.322	0.238	4.40079e-57	0	TUBB6
3.64434e-61	0.704985	0.392	0.313	6.19684e-57	0	CFH
2.23486e-60	0.320503	0.349	0.279	3.80016e-56	0	AIG1
2.11589e-59	0.30388	0.39	0.324	3.59785e-55	0	DYNLT3
6.52803e-59	0.311805	0.423	0.359	1.11003e-54	0	OPTN
1.08528e-58	0.305486	0.503	0.453	1.84541e-54	0	CAMLG
1.5403e-58	0.304869	0.472	0.416	2.61913e-54	0	ADH5
6.17428e-58	0.283204	0.684	0.645	1.04987e-53	0	DYNLT1
1.40477e-57	0.282855	0.564	0.524	2.38866e-53	0	PSMC5
3.68692e-56	0.268914	0.258	0.186	6.26924e-52	0	SH3PXD2A
1.08887e-55	0.262992	0.693	0.67	1.85151e-51	0	GADD45GIP1
4.06018e-55	0.325917	0.311	0.243	6.90393e-51	0	TCEAL3
1.98125e-54	0.276719	0.515	0.467	3.36891e-50	0	JAK1
2.53979e-54	0.259339	0.588	0.55	4.31865e-50	0	ACADVL
3.74021e-54	0.268423	0.494	0.439	6.35985e-50	0	ZNF428
5.5288e-54	0.270105	0.579	0.534	9.40117e-50	0	WASF2
1.08903e-53	0.251921	0.581	0.538	1.85179e-49	0	TCEAL8
1.53914e-53	0.323353	0.439	0.381	2.61715e-49	0	AOPEP
3.98476e-53	0.310955	0.333	0.27	6.77568e-49	0	ABI2
6.07578e-53	0.269705	0.369	0.303	1.03313e-48	0	BCAP29
6.09997e-53	0.293284	0.34	0.274	1.03724e-48	0	BTG3
6.5289e-53	0.345203	0.263	0.185	1.11017e-48	0	CD36
2.1883e-52	0.303136	0.473	0.426	3.72099e-48	0	MRPL32
1.17945e-51	0.251422	0.617	0.588	2.00554e-47	0	ATP6AP2
1.21905e-51	0.264536	0.574	0.541	2.07288e-47	0	COPS6
3.09633e-51	0.277647	0.306	0.237	5.265e-47	0	ELOVL5
4.48373e-50	0.310375	0.348	0.27	7.62413e-46	0	FHL2
9.38355e-50	0.26082	0.516	0.475	1.59558e-45	0	ATP6V1E1
2.89766e-49	0.304911	0.528	0.498	4.92718e-45	0	TMEM165
9.96891e-49	0.374858	0.331	0.276	1.69511e-44	0	TOB2
1.19845e-48	0.367906	0.421	0.365	2.03785e-44	0	CDKN1A
1.31429e-48	0.252676	0.622	0.592	2.23482e-44	0	DYNC1I2
1.53608e-48	0.268041	0.292	0.228	2.61195e-44	0	SGCB
3.85205e-48	0.325193	0.318	0.257	6.55003e-44	0	YAF2
3.27067e-46	0.263248	0.573	0.545	5.56144e-42	0	DDX24
5.79887e-46	0.267673	0.49	0.453	9.8604e-42	0	HNRNPH2
6.81036e-46	0.294635	0.389	0.337	1.15803e-41	0	ZBTB38
7.87384e-46	0.28226	0.51	0.477	1.33887e-41	0	WDR1
1.38359e-44	0.309513	0.298	0.24	2.35266e-40	0	ATP2B4
3.88346e-44	0.31415	0.361	0.31	6.60344e-40	0	CSNK1E
3.91858e-44	0.267352	0.462	0.414	6.66315e-40	0	BBX
5.96746e-44	0.269747	0.3	0.239	1.01471e-39	0	CDKN1B
1.57819e-43	0.264545	0.458	0.414	2.68355e-39	0	MAP4
2.05992e-43	0.266688	0.396	0.346	3.50268e-39	0	PDHB
2.71375e-43	0.287946	0.421	0.375	4.61445e-39	0	IMPDH2
3.52676e-43	0.277279	0.375	0.326	5.99691e-39	0	CZIB
4.93008e-43	0.356088	0.465	0.416	8.38311e-39	0	TOB1
3.07466e-42	0.260021	0.451	0.411	5.22815e-38	0	PIN1
8.43698e-42	0.254049	0.303	0.244	1.43462e-37	0	SEC23A
1.54e-41	0.636768	0.733	0.705	2.61862e-37	0	MT1X
7.54731e-41	0.260666	0.449	0.411	1.28334e-36	0	SARS1
7.88388e-41	0.254473	0.498	0.457	1.34058e-36	0	ADI1
1.86574e-40	0.284493	0.369	0.325	3.17251e-36	0	NFU1
7.96221e-40	0.259543	0.317	0.262	1.35389e-35	0	ZNF580
6.59507e-39	0.31121	0.339	0.283	1.12143e-34	0	CREM
7.95851e-38	0.271706	0.342	0.296	1.35326e-33	0	EMC2
8.03097e-38	0.278978	0.42	0.381	1.36559e-33	0	ITGB1BP1
8.76453e-35	0.257007	0.313	0.267	1.49032e-30	0	PRKRA
9.13848e-29	0.270673	0.356	0.323	1.55391e-24	0	ATP2A2
8.39817e-28	0.253781	0.293	0.25	1.42802e-23	0	CDC42EP4
1.31947e-23	0.264076	0.308	0.27	2.24363e-19	0	SIK1
1.34917e-20	0.273935	0.425	0.414	2.29412e-16	0	SLC38A2
2.34382e-17	0.289729	0.262	0.233	3.98543e-13	0	SLC12A2
5.32041e-17	0.448285	0.283	0.267	9.04682e-13	0	NET1
4.19073e-09	0.276437	0.282	0.27	7.12591e-05	0	CITED2
1.88051e-08	0.384325	0.387	0.391	0.000319762	0	BTG2
0	3.44942	0.561	0.095	0	1	ACKR1
0	2.98508	0.812	0.119	0	1	CLDN5
0	2.90531	0.94	0.325	0	1	SPRY1
0	2.85434	0.986	0.209	0	1	RAMP2
0	2.62349	0.973	0.326	0	1	PLVAP
0	2.50082	0.87	0.21	0	1	COL15A1
0	2.36518	0.945	0.422	0	1	HSPG2
0	2.36427	0.928	0.155	0	1	CD93
0	2.35368	0.513	0.127	0	1	STC1
0	2.31978	0.845	0.165	0	1	VWF
0	2.18387	0.923	0.292	0	1	HYAL2
0	2.17918	0.99	0.474	0	1	A2M
0	2.14746	0.896	0.104	0	1	CLEC14A
0	2.07109	0.873	0.376	0	1	EMP1
0	2.04985	0.838	0.092	0	1	CALCRL
0	2.04528	0.82	0.078	0	1	CDH5
0	2.04012	0.858	0.139	0	1	RAMP3
0	2.03751	0.877	0.083	0	1	ECSCR
0	1.98478	0.871	0.091	0	1	ADGRL4
0	1.94894	0.886	0.221	0	1	EGFL7
0	1.94609	0.932	0.325	0	1	TCF4
0	1.94549	0.916	0.28	0	1	ENG
0	1.91048	0.928	0.389	0	1	TGFBR2
0	1.90839	0.829	0.102	0	1	S1PR1
0	1.89032	0.916	0.442	0	1	RDX
0	1.87806	0.823	0.144	0	1	SLCO2A1
0	1.87135	0.836	0.329	0	1	SOCS3
0	1.85628	0.86	0.106	0	1	EMCN
0	1.85501	0.762	0.176	0	1	PODXL
0	1.85473	0.811	0.345	0	1	SLC9A3R2
0	1.84619	0.985	0.532	0	1	GNG11
0	1.82784	0.94	0.373	0	1	NPDC1
0	1.81879	0.923	0.416	0	1	AQP1
0	1.81679	0.675	0.124	0	1	RBP7
0	1.80737	0.84	0.489	0	1	TCIM
0	1.80535	0.991	0.505	0	1	SPARCL1
0	1.78716	0.798	0.099	0	1	JAM2
0	1.77585	0.442	0.171	0	1	FABP4
0	1.76862	0.822	0.342	0	1	PLPP1
0	1.7686	0.986	0.768	0	1	FKBP1A
0	1.73288	0.741	0.257	0	1	SLC2A3
0	1.72661	0.956	0.395	0	1	EPAS1
0	1.70553	0.695	0.07	0	1	SOX18
0	1.69436	0.969	0.552	0	1	CRIP2
0	1.67899	0.678	0.321	0	1	INSR
0	1.6592	0.847	0.187	0	1	ESAM
0	1.64073	0.904	0.42	0	1	IFITM1
0	1.63554	0.918	0.411	0	1	STOM
0	1.62823	0.844	0.345	0	1	MTUS1
0	1.62597	0.767	0.122	0	1	TMEM88
0	1.61535	0.823	0.255	0	1	ETS1
0	1.61367	0.814	0.187	0	1	CAVIN2
0	1.60521	0.563	0.076	0	1	F2RL3
0	1.60513	0.771	0.097	0	1	PTPRB
0	1.59883	0.967	0.524	0	1	IGFBP4
0	1.58137	0.739	0.065	0	1	TIE1
0	1.57704	0.75	0.095	0	1	ADCY4
0	1.56913	0.862	0.342	0	1	ETS2
0	1.56041	0.647	0.157	0	1	ADAMTS9
0	1.55892	0.693	0.118	0	1	NOTCH4
0	1.5508	0.769	0.08	0	1	MMRN2
0	1.5434	0.769	0.079	0	1	CYYR1
0	1.53912	0.844	0.324	0	1	COL4A1
0	1.53342	0.739	0.091	0	1	CD34
0	1.52669	0.917	0.358	0	1	RNASE1
0	1.51994	0.758	0.174	0	1	ICAM2
0	1.51654	0.766	0.218	0	1	APOLD1
0	1.51652	0.652	0.044	0	1	THSD7A
0	1.48977	0.674	0.083	0	1	FAM167B
0	1.48641	0.788	0.173	0	1	GIMAP7
0	1.48355	0.704	0.097	0	1	PALMD
0	1.47801	0.559	0.062	0	1	SOX17
0	1.47768	0.684	0.292	0	1	PRCP
0	1.45265	0.774	0.237	0	1	ADAM15
0	1.4454	0.771	0.246	0	1	HEG1
0	1.43991	0.724	0.172	0	1	GASK1B
0	1.43914	0.708	0.254	0	1	VWA1
0	1.42518	0.955	0.709	0	1	TM4SF1
0	1.4232	0.449	0.025	0	1	CCL14
0	1.4213	0.906	0.585	0	1	PDLIM1
0	1.41392	0.88	0.44	0	1	CCDC85B
0	1.40584	0.644	0.081	0	1	TSPAN7
0	1.40147	0.684	0.467	0	1	DEPP1
0	1.39657	0.672	0.156	0	1	PCDH17
0	1.39008	0.736	0.182	0	1	ITGA5
0	1.38959	0.678	0.051	0	1	DIPK2B
0	1.38948	0.818	0.195	0	1	GIMAP4
0	1.37899	0.734	0.317	0	1	KLF2
0	1.37813	0.753	0.248	0	1	NEDD9
0	1.369	0.705	0.13	0	1	DOCK9
0	1.36692	0.754	0.195	0	1	ELK3
0	1.36546	0.788	0.273	0	1	SWAP70
0	1.36008	0.671	0.089	0	1	FLT1
0	1.34487	0.613	0.093	0	1	PIK3R3
0	1.34101	0.47	0.041	0	1	APLNR
0	1.32807	0.97	0.715	0	1	GSN
0	1.32147	0.869	0.694	0	1	DDIT4
0	1.31618	0.756	0.247	0	1	SEC14L1
0	1.31419	0.522	0.041	0	1	IL33
0	1.31264	0.781	0.335	0	1	NDRG1
0	1.28338	0.84	0.298	0	1	BCAM
0	1.2821	0.645	0.136	0	1	THBD
0	1.27632	0.885	0.453	0	1	CAV1
0	1.27541	0.543	0.035	0	1	ZNF385D
0	1.27431	0.757	0.271	0	1	ITGA6
0	1.27385	0.757	0.43	0	1	ID1
0	1.27325	0.992	0.811	0	1	HLA-E
0	1.26593	0.682	0.157	0	1	MRTFB
0	1.26369	0.736	0.28	0	1	CFH
0	1.25912	0.84	0.426	0	1	IL6ST
0	1.25234	0.591	0.051	0	1	MCTP1
0	1.25117	0.578	0.199	0	1	ADAMTS1
0	1.25092	0.644	0.23	0	1	DUSP6
0	1.24002	0.737	0.223	0	1	EHD4
0	1.23905	0.909	0.516	0	1	IFI16
0	1.2304	0.994	0.712	0	1	IFI27
0	1.21257	0.636	0.131	0	1	SOCS2
0	1.21162	0.786	0.299	0	1	ARHGAP29
0	1.21038	0.89	0.446	0	1	TIMP3
0	1.20873	0.645	0.051	0	1	MYCT1
0	1.20681	0.752	0.289	0	1	TSHZ2
0	1.20609	0.805	0.33	0	1	COL4A2
0	1.19909	0.921	0.617	0	1	MYH9
0	1.19743	0.717	0.134	0	1	LDB2
0	1.19701	0.786	0.414	0	1	ATP1B3
0	1.19297	0.606	0.122	0	1	ADGRF5
0	1.18665	0.665	0.171	0	1	ENTPD1
0	1.17734	0.725	0.263	0	1	BMPR2
0	1.17171	0.636	0.117	0	1	FAM107A
0	1.1715	0.561	0.121	0	1	RPGR
0	1.16951	0.71	0.149	0	1	GIMAP5
0	1.1623	0.728	0.28	0	1	SYNPO
0	1.16175	0.541	0.131	0	1	EFNB2
0	1.16026	0.816	0.442	0	1	PRSS23
0	1.15418	0.847	0.433	0	1	MSN
0	1.15142	0.613	0.059	0	1	IL3RA
0	1.15099	0.666	0.238	0	1	TGM2
0	1.14496	0.824	0.452	0	1	GNAI2
0	1.14436	0.887	0.384	0	1	CAVIN1
0	1.14319	0.746	0.215	0	1	ITM2A
0	1.13908	0.612	0.045	0	1	ERG
0	1.13777	0.609	0.155	0	1	GJA1
0	1.136	0.667	0.189	0	1	C1orf54
0	1.13477	0.878	0.467	0	1	NFIB
0	1.12836	0.591	0.187	0	1	CEMIP2
0	1.10604	0.684	0.272	0	1	PLPP3
0	1.10527	0.677	0.194	0	1	GARRE1
0	1.10526	0.907	0.568	0	1	FABP5
0	1.10502	0.461	0.031	0	1	ADM5
0	1.09444	0.914	0.701	0	1	LMNA
0	1.07609	0.435	0.216	0	1	IGFBP3
0	1.06953	0.796	0.279	0	1	MEF2C
0	1.06294	0.76	0.305	0	1	CD320
0	1.05904	0.728	0.407	0	1	DUSP23
0	1.05524	0.757	0.414	0	1	VAMP5
0	1.05205	0.642	0.189	0	1	CDC42EP3
0	1.05181	0.73	0.396	0	1	SGK1
0	1.04956	0.552	0.077	0	1	LMO2
0	1.04924	0.6	0.142	0	1	LIFR
0	1.04767	0.523	0.069	0	1	KDR
0	1.04078	0.363	0.05	0	1	INHBB
0	1.04066	0.619	0.24	0	1	ARL4A
0	1.03931	0.991	0.836	0	1	IFITM2
0	1.02857	0.59	0.249	0	1	RCAN1
0	1.0191	0.535	0.128	0	1	PNP
0	1.01568	0.519	0.095	0	1	TGFBR3
0	1.00782	0.679	0.22	0	1	MALL
0	1.00761	0.4	0.149	0	1	CXCL12
0	1.0053	0.718	0.34	0	1	FOSL2
0	1.0022	0.316	0.072	0	1	ENPP2
0	1.00022	0.504	0.091	0	1	NES
0	0.99845	0.859	0.567	0	1	YBX3
0	0.996353	0.643	0.228	0	1	LMCD1
0	0.994488	0.738	0.306	0	1	CLIC4
0	0.992313	0.639	0.242	0	1	CMIP
0	0.99066	0.604	0.143	0	1	PLXND1
0	0.988283	0.475	0.189	0	1	SERPINE1
0	0.984259	0.569	0.146	0	1	RAI14
0	0.976963	0.55	0.12	0	1	MCF2L
0	0.975179	0.573	0.11	0	1	PTPRM
0	0.964483	0.629	0.184	0	1	SULF2
0	0.957586	0.475	0.061	0	1	CD200
0	0.956551	0.663	0.235	0	1	ECE1
0	0.955543	0.633	0.18	0	1	NOSTRIN
0	0.953304	0.608	0.221	0	1	MAST4
0	0.949664	0.995	0.757	0	1	VIM
0	0.947259	0.7	0.397	0	1	BHLHE40
0	0.945355	0.545	0.053	0	1	RASIP1
0	0.94529	0.646	0.194	0	1	TNS2
0	0.944977	0.457	0.049	0	1	SOX7
0	0.944948	0.627	0.331	0	1	NCOA7
0	0.944137	0.729	0.344	0	1	WWTR1
0	0.942601	0.684	0.268	0	1	GRAMD1A
0	0.940112	0.616	0.196	0	1	PIK3C2A
0	0.937458	0.499	0.058	0	1	TMTC1
0	0.937071	0.607	0.195	0	1	DLC1
0	0.937069	0.504	0.064	0	1	PLCB1
0	0.935614	0.52	0.058	0	1	CPLX1
0	0.93519	0.655	0.276	0	1	UPP1
0	0.931449	0.478	0.051	0	1	FAM110D
0	0.930799	0.534	0.058	0	1	ROBO4
0	0.923193	0.564	0.096	0	1	ELMO1
0	0.922736	0.604	0.188	0	1	SH3BP5
0	0.912662	0.573	0.182	0	1	ABL2
0	0.912373	0.519	0.048	0	1	TEK
0	0.909119	0.792	0.494	0	1	PRMT1
0	0.908073	0.427	0.152	0	1	ICAM1
0	0.907245	0.567	0.08	0	1	GIMAP6
0	0.904585	0.577	0.167	0	1	SNRK
0	0.903868	0.599	0.17	0	1	LIMCH1
0	0.902648	0.924	0.795	0	1	ZFP36
0	0.901584	0.562	0.103	0	1	GIMAP1
0	0.901187	0.846	0.537	0	1	TACC1
0	0.90025	0.765	0.371	0	1	EMP2
0	0.900073	0.578	0.109	0	1	ACVRL1
0	0.899419	0.729	0.321	0	1	CLEC2B
0	0.898024	0.446	0.096	0	1	BTNL9
0	0.894389	0.925	0.795	0	1	SNX3
0	0.894207	0.271	0.042	0	1	FCN3
0	0.892566	0.93	0.523	0	1	SRGN
0	0.891631	0.493	0.038	0	1	ARHGEF15
0	0.889809	0.266	0.013	0	1	SELP
0	0.887819	0.671	0.257	0	1	STING1
0	0.887192	0.581	0.189	0	1	SELENON
0	0.883537	0.427	0.04	0	1	HECW2
0	0.881043	0.885	0.566	0	1	SPTBN1
0	0.880087	0.867	0.579	0	1	CDC37
0	0.878959	0.552	0.162	0	1	SNTB2
0	0.876923	0.993	0.972	0	1	SRP14
0	0.875525	0.837	0.565	0	1	RAB13
0	0.872444	0.483	0.046	0	1	NRN1
0	0.871334	0.54	0.223	0	1	KCTD12
0	0.868201	0.561	0.116	0	1	SASH1
0	0.867306	0.425	0.106	0	1	SLC26A2
0	0.866245	0.55	0.109	0	1	LIMS2
0	0.859823	0.332	0.074	0	1	HEY1
0	0.857928	0.935	0.707	0	1	APP
0	0.857117	0.771	0.448	0	1	ID3
0	0.854015	0.535	0.095	0	1	CLIC2
0	0.849192	0.901	0.633	0	1	TSC22D1
0	0.848414	0.665	0.385	0	1	JMJD1C
0	0.843555	0.584	0.221	0	1	LAMB1
0	0.840073	0.566	0.157	0	1	TM4SF18
0	0.83752	0.278	0.074	0	1	IGF2
0	0.836247	0.822	0.556	0	1	ARGLU1
0	0.835457	1	0.923	0	1	IFITM3
0	0.835362	0.552	0.112	0	1	PRKCH
0	0.835252	0.488	0.085	0	1	CASKIN2
0	0.833946	0.542	0.155	0	1	LRRC32
0	0.830822	0.555	0.234	0	1	MYC
0	0.828403	0.409	0.043	0	1	GPR146
0	0.827605	0.612	0.249	0	1	HDAC7
0	0.826651	0.621	0.217	0	1	TMEM204
0	0.824027	0.472	0.069	0	1	FZD4
0	0.822901	0.59	0.211	0	1	LUZP1
0	0.822759	0.615	0.357	0	1	NR4A1
0	0.820746	0.652	0.289	0	1	CRIM1
0	0.820159	0.793	0.487	0	1	TNFRSF1A
0	0.819443	0.548	0.19	0	1	WARS1
0	0.817569	0.464	0.052	0	1	RHOJ
0	0.815961	0.856	0.658	0	1	MRPL33
0	0.807656	0.335	0.022	0	1	DLL4
0	0.807484	0.576	0.173	0	1	MCAM
0	0.80534	0.556	0.196	0	1	PKP4
0	0.801462	0.428	0.061	0	1	TNXB
0	0.79638	0.408	0.024	0	1	BCL6B
0	0.794741	0.754	0.403	0	1	CAVIN3
0	0.791395	0.754	0.408	0	1	RGCC
0	0.787469	0.59	0.165	0	1	SNCG
0	0.787464	0.398	0.058	0	1	OLFM1
0	0.782825	0.64	0.282	0	1	NRP1
0	0.781113	0.479	0.054	0	1	KANK3
0	0.7764	0.434	0.034	0	1	SHE
0	0.771412	0.673	0.377	0	1	TSPAN13
0	0.771088	0.386	0.065	0	1	ARL15
0	0.769881	0.424	0.03	0	1	SHROOM4
0	0.767038	0.888	0.653	0	1	CD81
0	0.761772	0.54	0.138	0	1	ABI3
0	0.761234	0.442	0.063	0	1	PLEKHG1
0	0.760904	0.562	0.245	0	1	SIK1
0	0.760292	0.545	0.148	0	1	ZEB1
0	0.760266	0.45	0.118	0	1	MECOM
0	0.757917	0.523	0.172	0	1	PTPRG
0	0.757722	0.398	0.125	0	1	HBEGF
0	0.757391	0.709	0.435	0	1	HIF1A
0	0.756233	0.595	0.222	0	1	LPAR6
0	0.754057	0.918	0.736	0	1	KTN1
0	0.753542	0.672	0.403	0	1	MIDN
0	0.752004	0.526	0.228	0	1	MPZL2
0	0.750585	0.429	0.079	0	1	ITPRIP
0	0.749844	0.445	0.051	0	1	FGD5
0	0.745637	0.595	0.348	0	1	CDKN1A
0	0.745362	0.423	0.094	0	1	NUAK1
0	0.743658	0.399	0.057	0	1	JAG2
0	0.742044	0.443	0.061	0	1	SH2D3C
0	0.740053	0.53	0.205	0	1	SHC1
0	0.737899	0.472	0.143	0	1	FSCN1
0	0.737	0.471	0.119	0	1	ABCG1
0	0.736026	0.726	0.409	0	1	NECTIN2
0	0.735021	0.624	0.291	0	1	UTRN
0	0.733779	0.413	0.031	0	1	SHANK3
0	0.733252	0.457	0.078	0	1	RAPGEF3
0	0.730004	0.39	0.034	0	1	DYSF
0	0.729128	0.412	0.082	0	1	FILIP1
0	0.724441	0.303	0.028	0	1	P2RY6
0	0.721528	0.775	0.574	0	1	CTNNB1
0	0.719828	0.502	0.157	0	1	CTTNBP2NL
0	0.716573	0.467	0.102	0	1	RPS6KA2
0	0.716034	0.995	0.894	0	1	IGFBP7
0	0.710626	0.604	0.305	0	1	UACA
0	0.710153	0.45	0.108	0	1	DOCK6
0	0.708665	0.407	0.035	0	1	PREX2
0	0.694243	0.619	0.328	0	1	WNK1
0	0.692633	0.512	0.215	0	1	ARID5A
0	0.692575	0.633	0.312	0	1	PEA15
0	0.692434	0.554	0.233	0	1	ITGA1
0	0.689592	0.403	0.043	0	1	SCARF1
0	0.684944	0.988	0.904	0	1	DDX5
0	0.68488	0.647	0.261	0	1	HTRA1
0	0.68462	0.418	0.078	0	1	GFOD1
0	0.684255	0.259	0.051	0	1	ADAMTS6
0	0.684009	0.385	0.043	0	1	SEMA6B
0	0.682342	1	0.954	0	1	HLA-B
0	0.68206	0.426	0.065	0	1	LRRC8C
0	0.679563	0.457	0.139	0	1	EPHB4
0	0.678994	0.371	0.068	0	1	FAM43A
0	0.677982	0.46	0.236	0	1	ARRDC3
0	0.675061	0.889	0.687	0	1	RHOC
0	0.674615	0.46	0.111	0	1	GFOD2
0	0.67413	0.545	0.234	0	1	ASS1
0	0.673087	0.48	0.127	0	1	DPYSL3
0	0.672598	0.367	0.034	0	1	RAPGEF4
0	0.67161	0.414	0.14	0	1	PLK2
0	0.670517	0.46	0.202	0	1	ANKRD28
0	0.670209	0.823	0.488	0	1	S100A16
0	0.668773	0.415	0.136	0	1	ADAMTS4
0	0.668751	0.465	0.089	0	1	FLI1
0	0.667112	0.565	0.242	0	1	CFI
0	0.666123	0.368	0.053	0	1	EPHA4
0	0.66215	0.566	0.236	0	1	XAF1
0	0.662098	0.674	0.389	0	1	PICALM
0	0.661842	0.404	0.078	0	1	RASGRP3
0	0.660881	0.525	0.305	0	1	UGCG
0	0.659714	0.365	0.027	0	1	TSPAN18
0	0.659045	0.381	0.04	0	1	HSPA12B
0	0.658542	0.405	0.055	0	1	IPO11
0	0.658132	0.645	0.329	0	1	DPYSL2
0	0.657954	0.356	0.059	0	1	RFLNB
0	0.655728	1	0.997	0	1	TMSB10
0	0.655209	0.943	0.78	0	1	TAGLN2
0	0.654698	0.853	0.68	0	1	SDCBP
0	0.652245	0.522	0.206	0	1	ADGRG1
0	0.65169	0.88	0.659	0	1	TPM4
0	0.651611	0.462	0.157	0	1	GRB10
0	0.650131	0.606	0.312	0	1	PTPN12
0	0.648227	0.351	0.025	0	1	NOS3
0	0.647618	0.483	0.156	0	1	FRY
0	0.646846	0.662	0.39	0	1	MACF1
0	0.645887	0.376	0.093	0	1	NEURL1B
0	0.641292	0.721	0.498	0	1	AKAP13
0	0.63993	0.53	0.223	0	1	PXN
0	0.635931	0.545	0.274	0	1	PPP3CA
0	0.634607	0.421	0.118	0	1	RAPGEF5
0	0.634554	0.36	0.056	0	1	AIF1L
0	0.63394	0.321	0.04	0	1	RBP5
0	0.632507	0.525	0.211	0	1	MAP3K11
0	0.631044	0.419	0.084	0	1	TAMALIN
0	0.63099	0.396	0.078	0	1	STAB1
0	0.629903	0.515	0.219	0	1	TUBB6
0	0.629794	0.379	0.078	0	1	PREX1
0	0.62791	0.997	0.964	0	1	ITM2B
0	0.627678	0.633	0.313	0	1	CARD16
0	0.627562	0.589	0.32	0	1	EFNA1
0	0.625905	0.495	0.19	0	1	LRRC8A
0	0.625701	0.513	0.229	0	1	HIPK3
0	0.625139	0.828	0.62	0	1	RAB11A
0	0.625039	0.636	0.359	0	1	TNFSF10
0	0.624934	0.739	0.465	0	1	STAT3
0	0.623349	0.523	0.197	0	1	ASAP1
0	0.622605	0.458	0.211	0	1	CTNNAL1
0	0.62258	0.932	0.784	0	1	JUNB
0	0.620663	0.433	0.097	0	1	CCDC69
0	0.620526	0.343	0.081	0	1	RASA4
0	0.620206	0.376	0.038	0	1	GIMAP8
0	0.619597	0.42	0.102	0	1	FAM241A
0	0.61953	0.372	0.108	0	1	NRP2
0	0.618898	0.603	0.287	0	1	BNIP2
0	0.616664	0.56	0.248	0	1	TSPAN14
0	0.615779	0.974	0.836	0	1	CD59
0	0.615388	0.549	0.216	0	1	LY96
0	0.615109	0.316	0.122	0	1	GJA4
0	0.613415	0.399	0.104	0	1	TCN2
0	0.613147	0.412	0.167	0	1	EFNB1
0	0.613	0.908	0.748	0	1	SELENOW
0	0.612718	0.795	0.604	0	1	YWHAH
0	0.610647	0.442	0.12	0	1	PITPNC1
0	0.609737	0.513	0.179	0	1	FYN
0	0.60972	0.711	0.452	0	1	SERINC3
0	0.606762	0.417	0.124	0	1	BCR
0	0.606748	0.384	0.051	0	1	ARHGAP31
0	0.606076	0.42	0.102	0	1	NOTCH1
0	0.60465	0.391	0.086	0	1	PLEKHO2
0	0.604029	0.386	0.088	0	1	SPNS2
0	0.603535	0.352	0.055	0	1	CYSLTR1
0	0.60115	0.383	0.1	0	1	ADGRL2
0	0.600928	0.341	0.048	0	1	SEMA3F
0	0.600637	0.391	0.067	0	1	GALNT18
0	0.600262	0.348	0.064	0	1	CCDC3
0	0.59942	0.658	0.38	0	1	KLF9
0	0.598997	0.674	0.44	0	1	ACTN1
0	0.598892	0.338	0.073	0	1	PDGFB
0	0.597675	0.366	0.033	0	1	TMEM255B
0	0.597055	0.817	0.536	0	1	MGST2
0	0.596161	0.593	0.345	0	1	ADD1
0	0.59578	0.995	0.938	0	1	NEAT1
0	0.592884	0.857	0.606	0	1	PTMS
0	0.592596	0.494	0.205	0	1	ABCD4
0	0.59217	0.462	0.159	0	1	TNFAIP1
0	0.591802	0.601	0.311	0	1	MGLL
0	0.590527	0.582	0.299	0	1	ODF2L
0	0.590229	0.349	0.042	0	1	PDE2A
0	0.588762	0.393	0.13	0	1	CX3CL1
0	0.587936	0.89	0.612	0	1	CNN3
0	0.586543	0.565	0.297	0	1	PKIG
0	0.586522	0.785	0.365	0	1	IGFBP2
0	0.586223	0.948	0.65	0	1	MGP
0	0.58543	0.351	0.067	0	1	TNFRSF4
0	0.58335	0.299	0.023	0	1	PCDH12
0	0.581394	0.509	0.252	0	1	SERTAD1
0	0.580778	0.717	0.501	0	1	NKTR
0	0.579984	0.52	0.27	0	1	MYO1B
0	0.579519	0.57	0.291	0	1	AHR
0	0.578637	0.338	0.063	0	1	SMAD1
0	0.577319	0.464	0.176	0	1	SLFN5
0	0.576063	0.648	0.375	0	1	RBMS1
0	0.575836	0.554	0.319	0	1	LAP3
0	0.575608	0.998	0.958	0	1	HLA-A
0	0.574871	0.339	0.094	0	1	SIPA1L2
0	0.574066	0.357	0.056	0	1	ARHGAP23
0	0.57368	0.52	0.246	0	1	MEF2A
0	0.573248	0.492	0.195	0	1	KLF7
0	0.572048	0.381	0.125	0	1	ASRGL1
0	0.57084	0.454	0.166	0	1	EVA1C
0	0.570189	0.729	0.375	0	1	SERPINH1
0	0.569299	0.672	0.417	0	1	SNHG7
0	0.567492	0.553	0.248	0	1	PLAT
0	0.567484	0.792	0.575	0	1	LEPROT
0	0.566845	0.381	0.107	0	1	PXDN
0	0.565599	0.293	0.04	0	1	NKX2-3
0	0.565007	0.428	0.126	0	1	CEP68
0	0.563139	0.875	0.656	0	1	CD99
0	0.562534	0.419	0.128	0	1	TAOK2
0	0.562009	0.453	0.164	0	1	YES1
0	0.561899	0.825	0.607	0	1	TPM3
0	0.561603	0.479	0.175	0	1	MGAT4A
0	0.560899	0.401	0.095	0	1	TTC28
0	0.558187	0.438	0.133	0	1	HIP1
0	0.557349	0.444	0.207	0	1	PINK1
0	0.556787	0.282	0.045	0	1	SNAI1
0	0.554328	0.691	0.43	0	1	SYNE2
0	0.554281	0.433	0.114	0	1	PARVB
0	0.553166	0.423	0.169	0	1	ATP8B1
0	0.552846	0.315	0.049	0	1	DLL1
0	0.552259	0.502	0.272	0	1	ATP2B1
0	0.551094	0.497	0.227	0	1	LAMA5
0	0.550573	0.331	0.027	0	1	CLEC1A
0	0.550262	1	0.998	0	1	PTMA
0	0.549475	0.426	0.17	0	1	CD36
0	0.549475	0.517	0.246	0	1	IFI44L
0	0.549415	0.732	0.495	0	1	FLOT1
0	0.545196	0.431	0.134	0	1	CHSY1
0	0.545111	0.45	0.231	0	1	CFAP20
0	0.544189	0.649	0.419	0	1	DDX3X
0	0.542637	0.913	0.798	0	1	GNAS
0	0.542358	0.35	0.079	0	1	CD109
0	0.54215	0.304	0.069	0	1	FOXC1
0	0.5403	0.412	0.162	0	1	RALGDS
0	0.540151	0.383	0.111	0	1	MAP3K6
0	0.537675	0.451	0.153	0	1	CARD8
0	0.536493	0.378	0.101	0	1	RFTN1
0	0.535949	0.274	0.032	0	1	STC2
0	0.535543	0.416	0.124	0	1	GBP4
0	0.535042	0.955	0.567	0	1	SPARC
0	0.53479	0.331	0.069	0	1	LEPR
0	0.53126	0.385	0.155	0	1	TPD52L1
0	0.531032	0.399	0.133	0	1	SEMA6A
0	0.530193	0.573	0.301	0	1	TJP1
0	0.528464	0.303	0.062	0	1	BDKRB2
0	0.527578	0.517	0.242	0	1	PHACTR2
0	0.526684	0.638	0.381	0	1	ARID5B
0	0.525813	0.689	0.462	0	1	NUCB1
0	0.524723	0.495	0.254	0	1	FNIP2
0	0.524694	0.264	0.047	0	1	F8
0	0.523871	0.436	0.179	0	1	HMBOX1
0	0.523604	0.275	0.033	0	1	ITGA10
0	0.521209	0.545	0.286	0	1	BCAP29
0	0.521003	0.324	0.035	0	1	NPR1
0	0.520179	0.329	0.048	0	1	ARAP3
0	0.51998	0.607	0.369	0	1	CCDC50
0	0.518534	0.331	0.056	0	1	CSGALNACT1
0	0.51526	0.772	0.483	0	1	MARCKSL1
0	0.514723	0.463	0.203	0	1	INPP1
0	0.514668	0.468	0.205	0	1	CYTH1
0	0.514536	0.365	0.104	0	1	AOC3
0	0.51442	0.467	0.165	0	1	PROS1
0	0.51337	0.561	0.294	0	1	CRBN
0	0.512381	0.527	0.285	0	1	SLC44A2
0	0.510819	0.549	0.303	0	1	ARHGEF12
0	0.510051	0.535	0.278	0	1	CRK
0	0.50858	0.339	0.07	0	1	ATP11C
0	0.507435	0.59	0.349	0	1	GNAQ
0	0.505747	0.462	0.2	0	1	CNOT6L
0	0.505118	0.469	0.201	0	1	KAT6A
0	0.505082	0.336	0.076	0	1	ANKRD29
0	0.503955	0.388	0.149	0	1	RALGAPA2
0	0.502483	0.351	0.067	0	1	TMEM273
0	0.502245	0.307	0.02	0	1	NOVA2
0	0.500616	0.953	0.831	0	1	GUK1
0	0.499238	0.354	0.079	0	1	CPNE2
0	0.498716	0.466	0.218	0	1	TRIOBP
0	0.497617	0.28	0.018	0	1	AFAP1L1
0	0.494926	0.541	0.275	0	1	QKI
0	0.49417	0.427	0.188	0	1	TLNRD1
0	0.494059	0.279	0.034	0	1	CPXM2
0	0.493741	0.442	0.143	0	1	F2R
0	0.492504	0.337	0.079	0	1	PPM1F
0	0.491908	0.268	0.033	0	1	CLEC3B
0	0.491776	0.4	0.126	0	1	APOL3
0	0.490254	0.386	0.124	0	1	CPNE8
0	0.488401	0.37	0.101	0	1	CDK17
0	0.487703	0.947	0.809	0	1	DUSP1
0	0.484678	0.49	0.24	0	1	FKBP9
0	0.483997	0.392	0.124	0	1	RIPOR1
0	0.483536	0.337	0.1	0	1	NDST1
0	0.480483	0.406	0.149	0	1	PCDH1
0	0.480405	0.535	0.288	0	1	RNF115
0	0.479883	0.44	0.183	0	1	ABHD17A
0	0.477643	0.386	0.144	0	1	SLC29A1
0	0.477246	0.337	0.109	0	1	PLXNA2
0	0.476543	0.508	0.276	0	1	NFE2L1
0	0.476431	0.485	0.243	0	1	VAT1
0	0.476418	0.391	0.175	0	1	PELI1
0	0.474082	0.354	0.08	0	1	HOXB4
0	0.473757	0.419	0.171	0	1	FRMD4B
0	0.473738	0.284	0.037	0	1	ABCB1
0	0.472817	0.478	0.23	0	1	MOB2
0	0.471824	0.349	0.146	0	1	LAMA4
0	0.470892	0.319	0.084	0	1	FBXO31
0	0.470474	0.671	0.317	0	1	COX7A1
0	0.469788	0.478	0.245	0	1	ATN1
0	0.469369	0.35	0.134	0	1	CLDN15
0	0.469364	0.385	0.153	0	1	PTPN14
0	0.468566	0.527	0.254	0	1	MAGI1
0	0.468239	0.298	0.03	0	1	HOXD8
0	0.4678	0.33	0.084	0	1	TMCC3
0	0.464262	0.907	0.595	0	1	FXYD5
0	0.463778	0.47	0.238	0	1	ABLIM1
0	0.462061	0.387	0.165	0	1	ADIPOR2
0	0.462059	0.297	0.062	0	1	ST8SIA4
0	0.459653	0.445	0.2	0	1	PCGF2
0	0.459576	0.458	0.218	0	1	MED13L
0	0.458996	0.285	0.038	0	1	ZNF521
0	0.458991	0.286	0.091	0	1	HAPLN3
0	0.456971	0.664	0.408	0	1	HLA-F
0	0.453049	0.709	0.365	0	1	GMFG
0	0.45185	0.478	0.243	0	1	PML
0	0.451838	0.376	0.15	0	1	TMEM184B
0	0.450296	0.319	0.07	0	1	MFAP3
0	0.448947	0.406	0.138	0	1	TNFRSF1B
0	0.446681	0.503	0.258	0	1	PPFIBP1
0	0.444292	0.406	0.179	0	1	SH3BGRL2
0	0.441097	0.286	0.045	0	1	DCHS1
0	0.440923	0.439	0.194	0	1	RGL2
0	0.438633	0.369	0.124	0	1	ARHGEF3
0	0.438375	0.487	0.182	0	1	PTP4A3
0	0.438151	0.262	0.029	0	1	PGM5
0	0.437793	0.31	0.068	0	1	ATOH8
0	0.436741	0.413	0.183	0	1	FRYL
0	0.436334	0.996	0.96	0	1	HLA-C
0	0.436225	0.394	0.181	0	1	TBC1D1
0	0.434367	0.321	0.081	0	1	SH2B3
0	0.433894	0.292	0.102	0	1	LTC4S
0	0.433447	0.414	0.184	0	1	OSMR
0	0.432796	0.296	0.073	0	1	CRACDL
0	0.431921	0.362	0.108	0	1	A4GALT
0	0.431822	0.422	0.185	0	1	GPRC5B
0	0.426762	0.994	0.888	0	1	CD74
0	0.426196	0.266	0.041	0	1	FAM89A
0	0.425544	0.612	0.35	0	1	PDK4
0	0.425516	0.358	0.146	0	1	ST6GAL1
0	0.423841	0.517	0.233	0	1	AP1S2
0	0.422998	0.506	0.253	0	1	ITGB4
0	0.422511	0.446	0.22	0	1	ROCK2
0	0.422484	0.301	0.059	0	1	DOCK4
0	0.420111	0.385	0.15	0	1	TMEM47
0	0.419737	0.297	0.084	0	1	MLKL
0	0.419296	0.322	0.122	0	1	NOL4L
0	0.419231	0.361	0.128	0	1	KBTBD2
0	0.418975	0.335	0.13	0	1	MATN2
0	0.418538	0.341	0.117	0	1	FZD6
0	0.416009	0.332	0.108	0	1	HDGFL3
0	0.415789	0.347	0.129	0	1	TBCD
0	0.414702	0.309	0.076	0	1	ITPKB
0	0.414577	0.437	0.209	0	1	MAPK3
0	0.414406	0.275	0.053	0	1	ZNF467
0	0.413975	0.358	0.116	0	1	TEAD2
0	0.413865	0.277	0.064	0	1	TNFAIP8L1
0	0.413473	0.972	0.892	0	1	RAC1
0	0.413023	0.331	0.128	0	1	FAM171A1
0	0.408165	0.381	0.154	0	1	RASAL2
0	0.405842	0.438	0.192	0	1	BAG3
0	0.405223	0.361	0.157	0	1	BCL3
0	0.403987	0.32	0.084	0	1	JAM3
0	0.400367	0.448	0.19	0	1	FERMT2
0	0.399408	0.333	0.122	0	1	SOS1
0	0.399006	0.354	0.135	0	1	EML3
0	0.398968	0.304	0.093	0	1	NAV1
0	0.397261	0.306	0.118	0	1	ITPKC
0	0.397044	0.316	0.105	0	1	CDA
0	0.396773	0.282	0.059	0	1	TMEM150C
0	0.3948	0.298	0.093	0	1	CLSTN3
0	0.393955	0.355	0.141	0	1	MANSC1
0	0.393815	0.332	0.092	0	1	OLFML2A
0	0.393678	0.76	0.439	0	1	NNMT
0	0.39351	0.329	0.115	0	1	AFAP1
0	0.393069	0.302	0.065	0	1	GPR4
0	0.390612	0.29	0.08	0	1	C1orf115
0	0.390251	0.313	0.107	0	1	PTBP2
0	0.386888	0.344	0.117	0	1	TSPAN9
0	0.383089	1	0.999	0	1	RPS28
0	0.382964	0.329	0.086	0	1	CNRIP1
0	0.382087	0.335	0.116	0	1	LRCH1
0	0.380843	0.362	0.149	0	1	PRKD2
0	0.375196	0.323	0.111	0	1	FES
0	0.374164	0.34	0.129	0	1	TANC1
0	0.37301	0.329	0.114	0	1	APBB2
0	0.372592	0.287	0.086	0	1	TECPR1
0	0.370816	0.259	0.065	0	1	TEAD4
0	0.369118	0.297	0.102	0	1	CASP10
0	0.368091	0.392	0.155	0	1	JCAD
0	0.36568	0.301	0.098	0	1	GIT1
0	0.365615	0.324	0.123	0	1	RAPGEF1
0	0.364549	0.316	0.1	0	1	FAM13C
0	0.361539	0.263	0.07	0	1	CASTOR1
0	0.359689	0.292	0.077	0	1	GNB4
0	0.355352	0.315	0.127	0	1	MFSD6
0	0.353644	0.323	0.112	0	1	IRAK3
0	0.352943	0.265	0.079	0	1	NFATC1
0	0.352836	0.329	0.131	0	1	TSPAN12
0	0.352739	0.364	0.149	0	1	LIX1L
0	0.350845	0.275	0.087	0	1	CADPS2
0	0.349604	0.272	0.067	0	1	SLC35G2
0	0.348735	0.319	0.125	0	1	RAPGEF2
0	0.348111	0.283	0.085	0	1	PGS1
0	0.347407	1	0.999	0	1	B2M
0	0.343404	0.294	0.076	0	1	MFNG
0	0.340673	0.292	0.109	0	1	GAS2L1
0	0.340656	0.305	0.109	0	1	STAT5B
0	0.334345	0.279	0.073	0	1	MPDZ
0	0.322704	0.295	0.11	0	1	EPB41L4A
0	0.322392	0.318	0.124	0	1	DENND5A
0	0.318188	0.286	0.095	0	1	MCC
0	0.313846	0.368	0.137	0	1	EBF1
0	0.313152	0.251	0.083	0	1	DGKE
0	0.309609	0.276	0.089	0	1	STXBP1
0	0.309095	0.279	0.087	0	1	NLRP1
0	0.306367	0.267	0.09	0	1	TAF1C
0	0.299516	0.268	0.092	0	1	NUDCD1
0	0.298671	0.273	0.075	0	1	LYL1
0	0.292081	0.522	0.25	0	1	MMP2
0	0.284048	0.271	0.09	0	1	SMIM10
0	0.28186	0.312	0.117	0	1	HOTAIRM1
5.71527e-308	0.542024	0.467	0.238	9.71825e-304	1	KLF4
3.37853e-307	0.391395	0.432	0.207	5.74486e-303	1	CD40
9.87409e-307	0.421026	0.381	0.174	1.67899e-302	1	FRMD8
1.24202e-306	0.446483	0.883	0.734	2.11193e-302	1	YWHAE
2.59238e-305	0.46586	0.436	0.213	4.40808e-301	1	CSRNP1
3.93939e-305	0.284993	0.281	0.101	6.69854e-301	1	RCAN2
8.88721e-305	0.399791	0.382	0.174	1.51118e-300	1	DGKZ
7.14224e-303	0.457802	0.455	0.236	1.21447e-298	1	SLK
2.50136e-302	0.562843	0.749	0.557	4.25331e-298	1	MAP1LC3B
1.24728e-301	0.499824	0.732	0.509	2.12088e-297	1	CYB5R3
2.4714e-301	0.288445	0.25	0.087	4.20236e-297	1	RIMKLB
5.00474e-301	0.514301	0.736	0.531	8.51006e-297	1	CSNK1A1
2.0483e-298	0.474855	0.611	0.374	3.48293e-294	1	VGLL4
1.38115e-297	0.524579	0.66	0.424	2.34851e-293	1	NAMPT
3.46333e-296	0.310384	0.285	0.109	5.88905e-292	1	CAMSAP2
1.83164e-295	0.332998	0.272	0.103	3.11452e-291	1	SBNO2
1.47587e-293	0.402572	0.445	0.226	2.50957e-289	1	SEPTIN10
3.0956e-293	0.390884	0.451	0.225	5.26376e-289	1	ATXN3
1.63555e-290	0.400508	0.398	0.188	2.78109e-286	1	PRXL2C
3.37992e-290	0.284619	0.263	0.096	5.74722e-286	1	FUT11
4.39875e-290	0.340936	0.361	0.159	7.47963e-286	1	KLHL5
1.71337e-289	0.449257	0.544	0.312	2.91341e-285	1	SUN1
2.99915e-289	0.325349	0.391	0.171	5.09976e-285	1	FXYD6
3.62242e-289	0.516365	0.721	0.521	6.15957e-285	1	WASF2
5.5329e-288	0.320722	0.325	0.135	9.40815e-284	1	EVA1B
8.31529e-288	0.37181	0.338	0.144	1.41393e-283	1	DENND3
1.35581e-286	0.429927	0.336	0.145	2.30541e-282	1	PTPRE
5.28975e-286	0.502125	0.635	0.41	8.99468e-282	1	PDLIM5
1.25898e-285	0.559899	0.592	0.371	2.14076e-281	1	PIM3
1.41868e-285	0.48619	0.719	0.494	2.41233e-281	1	PTTG1IP
5.76263e-285	0.310078	0.306	0.125	9.79877e-281	1	DOCK1
7.47893e-285	0.387001	0.371	0.173	1.27172e-280	1	PPP2R5A
4.28159e-284	0.349989	0.299	0.123	7.28042e-280	1	KIAA1671
1.86716e-281	0.401293	0.444	0.228	3.17492e-277	1	RPS6KA3
5.12484e-280	0.474198	0.63	0.395	8.71428e-276	1	STMN1
9.36584e-280	0.295389	0.29	0.114	1.59257e-275	1	KCTD10
1.48904e-279	0.552924	0.7	0.493	2.53197e-275	1	FOXP1
8.6905e-278	0.408616	0.457	0.238	1.47773e-273	1	PKN1
7.21585e-276	0.444251	0.558	0.328	1.22698e-271	1	NASP
1.50988e-271	0.315353	0.378	0.17	2.5674e-267	1	ZSCAN18
3.82163e-270	0.380581	0.388	0.187	6.4983e-266	1	ERF
1.14678e-268	0.357751	0.369	0.173	1.94998e-264	1	SKI
1.58519e-268	0.379329	0.82	0.607	2.69546e-264	1	ACTN4
1.62128e-268	0.485104	0.664	0.456	2.75683e-264	1	GNB1
1.73542e-268	0.325359	0.387	0.179	2.9509e-264	1	IKBIP
1.12026e-267	0.426279	0.579	0.338	1.9049e-263	1	TSPAN4
3.4938e-267	0.465278	0.721	0.515	5.94086e-263	1	ARL2
2.01616e-264	0.53829	0.718	0.513	3.42829e-260	1	CARHSP1
4.71162e-262	0.355684	0.375	0.181	8.01164e-258	1	CDC42BPB
3.80459e-260	0.442555	0.494	0.281	6.46932e-256	1	SPAG9
1.9125e-259	0.402458	0.458	0.249	3.25201e-255	1	RALB
5.35342e-259	0.365848	0.36	0.171	9.10296e-255	1	SPTLC2
9.06996e-259	0.494916	0.611	0.399	1.54226e-254	1	MAP4
2.99556e-258	0.309213	0.264	0.105	5.09364e-254	1	TNK2
3.71875e-257	0.358602	0.9	0.735	6.32336e-253	1	ITGB1
1.2017e-255	0.528445	0.644	0.438	2.04337e-251	1	DDX21
1.94096e-255	0.490028	0.534	0.321	3.3004e-251	1	EFCAB14
2.14282e-253	0.3775	0.944	0.843	3.64365e-249	1	EIF4A1
4.20005e-253	0.340736	0.351	0.164	7.14177e-249	1	PIEZO1
3.7532e-251	0.433701	0.591	0.372	6.38194e-247	1	NCKAP1
2.70938e-250	0.462076	0.756	0.556	4.60703e-246	1	PLSCR1
9.71603e-250	0.483531	0.586	0.381	1.65211e-245	1	RNF145
1.16583e-249	0.460776	0.722	0.519	1.98238e-245	1	CTNNA1
2.44412e-248	0.4052	0.491	0.277	4.15599e-244	1	LAMC1
2.47444e-247	0.317213	0.283	0.119	4.20754e-243	1	PPP1R9B
3.72436e-246	0.471867	0.695	0.499	6.3329e-242	1	IRF2BP2
1.75631e-245	0.313674	0.3	0.131	2.98642e-241	1	USP36
4.26555e-245	0.438189	0.63	0.42	7.25314e-241	1	RBM17
7.47869e-245	0.284631	0.269	0.11	1.27168e-240	1	ERC1
7.53643e-245	0.321021	0.382	0.189	1.2815e-240	1	ICA1
2.20781e-244	0.306506	0.281	0.117	3.75416e-240	1	SLC27A3
1.88375e-243	0.300232	0.666	0.419	3.20312e-239	1	TINAGL1
6.81749e-243	0.287279	0.299	0.127	1.15925e-238	1	PRKD3
1.07975e-242	0.330467	0.377	0.183	1.836e-238	1	CHST12
5.4926e-242	0.682507	0.915	0.855	9.33961e-238	1	TXNIP
6.66489e-242	0.468907	0.584	0.382	1.1333e-237	1	ARPC5L
9.6383e-242	0.407298	0.53	0.312	1.6389e-237	1	AFDN
1.15382e-241	0.440371	0.616	0.407	1.96195e-237	1	SMARCE1
1.79051e-241	0.395616	0.415	0.222	3.04458e-237	1	FNBP1L
7.30182e-241	0.371305	0.432	0.23	1.2416e-236	1	TRIM47
2.19621e-240	0.447178	0.826	0.605	3.73443e-236	1	BST2
4.71323e-240	0.341035	0.349	0.168	8.01438e-236	1	EIF2AK4
1.46713e-239	0.320663	0.303	0.134	2.49471e-235	1	LPCAT2
2.92707e-239	0.446743	0.549	0.338	4.97718e-235	1	SPTAN1
9.01458e-239	0.295686	0.318	0.141	1.53284e-234	1	TPST2
1.08105e-238	0.346789	0.399	0.204	1.83821e-234	1	TBC1D15
1.07916e-237	0.458819	0.78	0.592	1.835e-233	1	AHNAK
1.09462e-236	0.441446	0.824	0.687	1.8613e-232	1	ENY2
2.72716e-235	0.322779	0.319	0.146	4.63727e-231	1	HERC1
9.68534e-235	0.357222	0.285	0.123	1.6469e-230	1	DUSP5
7.22908e-234	0.297424	0.304	0.135	1.22923e-229	1	FOXO1
1.89685e-233	0.314057	0.32	0.147	3.22541e-229	1	DGKH
2.5509e-233	0.363495	0.488	0.28	4.33755e-229	1	FLYWCH2
1.95759e-232	0.316194	0.26	0.107	3.32868e-228	1	SLCO4A1
3.58152e-231	0.328424	0.87	0.698	6.09001e-227	1	ARPC1B
5.86999e-231	0.336994	0.413	0.213	9.98133e-227	1	RILPL2
6.16729e-231	0.34508	0.36	0.172	1.04869e-226	1	GBP1
1.11876e-229	0.370814	0.456	0.254	1.90234e-225	1	PITPNB
1.49825e-229	0.399663	0.605	0.385	2.54762e-225	1	PLEC
1.4053e-228	0.449429	0.793	0.624	2.38958e-224	1	WSB1
1.72347e-228	0.406389	0.832	0.688	2.93059e-224	1	DDX17
2.22494e-228	0.300463	0.322	0.15	3.78328e-224	1	DELE1
3.85431e-227	0.283076	0.255	0.105	6.55386e-223	1	SDE2
7.79158e-226	0.451864	0.396	0.208	1.32488e-221	1	RGS3
1.86031e-225	0.438897	0.636	0.44	3.16327e-221	1	FDPS
7.74528e-225	0.339639	0.379	0.194	1.31701e-220	1	IL4R
4.52026e-223	0.335799	0.379	0.196	7.68625e-219	1	CCNY
7.51348e-223	0.399985	0.464	0.271	1.27759e-218	1	STX12
7.67048e-222	0.447888	0.599	0.389	1.30429e-217	1	PLS3
3.89518e-221	0.385064	0.645	0.432	6.62336e-217	1	IFNGR1
5.49837e-221	0.279273	0.272	0.118	9.34942e-217	1	DAB2IP
8.02834e-220	0.283477	0.299	0.136	1.36514e-215	1	DIAPH2
8.18893e-220	0.387356	0.524	0.317	1.39245e-215	1	TMEM109
6.00101e-219	0.340532	0.291	0.132	1.02041e-214	1	EXOC6
6.23089e-219	0.670809	0.586	0.418	1.0595e-214	1	XIST
1.56635e-217	0.368081	0.444	0.251	2.66343e-213	1	CYFIP1
2.21098e-217	0.28695	0.306	0.14	3.75955e-213	1	RARA
6.05744e-216	0.404179	0.685	0.493	1.03001e-211	1	SH3GLB1
1.06196e-215	0.37062	0.484	0.285	1.80575e-211	1	TMOD3
1.32218e-215	0.369034	0.324	0.157	2.24823e-211	1	LYST
7.6611e-215	0.339792	0.273	0.117	1.30269e-210	1	PRDM1
3.92124e-214	0.358657	0.895	0.788	6.66768e-210	1	SON
4.59547e-212	0.256216	0.253	0.106	7.81413e-208	1	MEX3C
1.09006e-211	0.459388	0.626	0.439	1.85354e-207	1	MBNL1
2.49469e-211	0.428079	0.77	0.596	4.24197e-207	1	LRRFIP1
2.63775e-211	0.342134	0.437	0.244	4.48523e-207	1	NFAT5
1.50466e-210	0.300134	0.325	0.158	2.55852e-206	1	CDC27
1.10597e-209	0.531545	0.878	0.749	1.88059e-205	1	NFKBIA
1.77764e-209	0.34458	0.417	0.229	3.0227e-205	1	ATP2B4
2.7521e-209	0.421743	0.607	0.412	4.67967e-205	1	ELF1
1.09072e-208	0.401569	0.73	0.538	1.85467e-204	1	CFLAR
1.94543e-208	0.304075	0.375	0.188	3.30801e-204	1	TGFB1
3.54514e-208	0.292401	0.317	0.152	6.02816e-204	1	STIM2
1.02591e-207	0.433674	0.716	0.55	1.74447e-203	1	KMT2E
1.74251e-207	0.400371	0.604	0.408	2.96296e-203	1	RAB6A
1.44231e-206	0.346038	0.419	0.232	2.45251e-202	1	CEBPG
2.89801e-206	0.385309	0.506	0.307	4.92778e-202	1	BAZ1A
6.53556e-206	0.362222	0.38	0.206	1.11131e-201	1	BCAR1
7.4871e-206	0.330777	0.907	0.8	1.27311e-201	1	EID1
7.89231e-206	0.348508	0.393	0.211	1.34201e-201	1	WDR60
9.02365e-205	0.390047	0.476	0.285	1.53438e-200	1	UBE2J1
1.55317e-204	0.343235	0.364	0.19	2.64102e-200	1	SLC12A7
9.26869e-204	0.327725	0.392	0.21	1.57605e-199	1	ABCE1
2.25358e-203	0.30813	0.36	0.184	3.83199e-199	1	RABGAP1
2.96731e-203	0.396225	0.283	0.129	5.04561e-199	1	NR4A2
4.63959e-203	0.314793	1	1	7.88915e-199	1	MALAT1
9.52979e-202	0.304132	0.343	0.174	1.62045e-197	1	IKBKB
1.41108e-201	0.370259	0.5	0.301	2.39939e-197	1	ITPRID2
1.58605e-200	0.385496	0.598	0.401	2.69692e-196	1	CASP4
2.90501e-200	0.253592	0.28	0.127	4.93967e-196	1	ARHGAP17
5.7539e-200	0.2756	0.28	0.128	9.78393e-196	1	DBN1
6.29374e-200	0.367259	0.669	0.477	1.07019e-195	1	CAPNS1
4.647e-197	0.284039	0.321	0.157	7.90176e-193	1	ARHGEF7
1.24045e-196	0.478124	0.903	0.826	2.10926e-192	1	CALM1
2.85806e-196	0.295869	0.328	0.163	4.85984e-192	1	SLC39A10
1.46111e-195	0.434017	0.78	0.629	2.48446e-191	1	CAPZA2
2.55465e-194	0.335005	0.456	0.263	4.34394e-190	1	SMARCA2
5.96178e-194	0.340237	0.614	0.393	1.01374e-189	1	NFIA
8.81493e-194	0.391686	0.698	0.513	1.49889e-189	1	ATRX
1.86343e-193	0.378029	0.989	0.976	3.16858e-189	1	ACTG1
4.74729e-191	0.320661	0.47	0.278	8.0723e-187	1	MYCBP2
3.35432e-190	0.294864	0.364	0.191	5.70369e-186	1	ARHGEF2
7.60005e-190	0.67829	0.673	0.488	1.29231e-185	1	HES1
9.87062e-190	0.372683	0.636	0.449	1.6784e-185	1	SERINC1
3.2494e-189	0.402793	0.253	0.118	5.52528e-185	1	LRRC1
3.34664e-189	0.374051	0.497	0.304	5.69062e-185	1	KLF10
1.76863e-188	0.321822	0.436	0.252	3.00737e-184	1	ELF2
4.98447e-187	0.320958	0.441	0.245	8.47559e-183	1	C11orf96
1.10186e-186	0.384859	0.595	0.414	1.87361e-182	1	MGMT
1.82201e-186	0.389089	0.659	0.474	3.09815e-182	1	SERPINB6
4.2289e-186	0.377318	0.575	0.387	7.19081e-182	1	SHISA5
1.63578e-185	0.311197	0.387	0.213	2.78148e-181	1	AFF1
4.80462e-185	0.316585	0.406	0.229	8.16977e-181	1	MAP4K4
5.70502e-185	0.377518	0.634	0.456	9.70082e-181	1	JAK1
4.03511e-184	0.401758	0.664	0.48	6.8613e-180	1	FAM177A1
1.07785e-183	0.329954	0.42	0.243	1.83277e-179	1	EGLN2
2.72965e-183	0.374021	0.707	0.541	4.64149e-179	1	RAB5C
2.91524e-183	0.303526	0.383	0.21	4.95707e-179	1	POLK
5.08207e-182	0.254371	0.262	0.12	8.64156e-178	1	INPP5K
2.26046e-181	0.368484	0.558	0.373	3.84369e-177	1	G3BP1
3.99574e-181	0.262077	0.318	0.159	6.79436e-177	1	PDCL
9.55437e-181	0.385359	0.8	0.637	1.62462e-176	1	IER2
1.35551e-180	0.905165	0.328	0.179	2.30491e-176	1	EDN1
8.26152e-180	0.259073	0.292	0.142	1.40479e-175	1	MARCHF2
1.16983e-178	0.304253	0.482	0.292	1.98918e-174	1	TAP1
2.87522e-178	0.289936	0.319	0.164	4.88902e-174	1	EIF4G3
4.40625e-178	0.272127	0.341	0.177	7.49239e-174	1	RECQL
6.52416e-178	0.345724	0.453	0.272	1.10937e-173	1	CPD
8.72276e-178	0.287064	0.364	0.197	1.48322e-173	1	HERC2
1.10603e-177	0.354878	0.769	0.597	1.8807e-173	1	FCGRT
7.34082e-177	0.363778	0.578	0.4	1.24823e-172	1	SRSF4
1.60273e-175	0.373017	0.322	0.169	2.72529e-171	1	KDM6B
5.52528e-175	0.252199	0.507	0.29	9.39519e-171	1	ZBTB16
9.9001e-175	0.281658	0.397	0.222	1.68341e-170	1	RB1
6.10198e-174	0.353987	0.602	0.415	1.03758e-169	1	SLC3A2
2.12599e-173	0.281863	0.507	0.306	3.61504e-169	1	PSIP1
3.81388e-173	0.250135	0.996	0.98	6.48513e-169	1	H3-3A
3.00639e-172	0.260167	0.445	0.257	5.11207e-168	1	PAM
4.80084e-172	0.278873	0.332	0.175	8.16334e-168	1	ATP11A
4.92697e-172	0.351067	0.43	0.261	8.37782e-168	1	CDK2AP1
5.37344e-172	0.250382	0.306	0.154	9.137e-168	1	RC3H2
1.2621e-171	0.477983	0.393	0.233	2.14607e-167	1	IL1R1
1.26624e-171	0.352848	0.809	0.68	2.15311e-167	1	SERBP1
2.22624e-171	0.340817	0.982	0.953	3.7855e-167	1	UBC
3.54495e-171	0.327017	0.477	0.299	6.02782e-167	1	CSNK1E
4.45559e-170	0.309013	0.407	0.238	7.57628e-166	1	ESYT2
6.85214e-170	0.422857	0.91	0.827	1.16514e-165	1	POMP
8.44833e-169	0.31719	0.544	0.358	1.43655e-164	1	SPCS3
1.07511e-167	0.258329	0.352	0.19	1.82812e-163	1	KCTD20
3.17834e-167	0.315078	0.457	0.276	5.40444e-163	1	GBP2
3.52732e-166	0.342579	0.453	0.278	5.99786e-162	1	MKNK2
4.03046e-166	0.37037	0.505	0.325	6.85339e-162	1	SKIL
5.95981e-165	0.432682	0.768	0.641	1.01341e-160	1	NDUFA12
1.0554e-164	0.468176	0.568	0.409	1.7946e-160	1	MLEC
1.34557e-164	0.306419	0.927	0.834	2.288e-160	1	SEC62
7.15746e-164	0.302913	0.568	0.375	1.21705e-159	1	RBPMS
4.88361e-163	0.333796	0.375	0.214	8.3041e-159	1	SLC20A1
6.7606e-163	0.508432	0.766	0.632	1.14957e-158	1	JUND
2.50033e-162	0.273349	0.312	0.163	4.25156e-158	1	SH3BP2
7.58967e-160	0.254658	0.351	0.192	1.29055e-155	1	CDS2
1.23648e-159	0.278562	0.393	0.226	2.10251e-155	1	BTN3A2
1.49033e-159	0.30626	0.435	0.265	2.53416e-155	1	UBE2G2
2.75742e-158	0.264096	0.331	0.176	4.68872e-154	1	REV3L
5.28593e-158	0.278297	0.746	0.532	8.9882e-154	1	CAV2
2.6768e-156	0.260925	0.332	0.18	4.55164e-152	1	EHBP1L1
3.71647e-156	0.283316	0.361	0.203	6.31948e-152	1	NCOA3
5.91158e-156	0.342553	0.856	0.727	1.00521e-151	1	TSC22D3
1.13127e-154	0.296875	0.402	0.239	1.92361e-150	1	KLC1
1.83098e-154	0.342947	0.77	0.625	3.1134e-150	1	SET
2.74808e-154	0.301947	0.441	0.271	4.67283e-150	1	NCK1
1.50498e-153	0.304264	0.367	0.212	2.55907e-149	1	ADAM17
1.68596e-153	0.281328	0.389	0.228	2.8668e-149	1	PRKAR2A
3.94915e-153	0.297897	0.49	0.31	6.71513e-149	1	VSIR
9.62193e-153	0.30803	0.477	0.304	1.63611e-148	1	ERICH1
6.57312e-152	0.292952	0.382	0.224	1.11769e-147	1	PHACTR4
7.47795e-151	0.339916	0.732	0.589	1.27155e-146	1	EIF4B
2.86146e-150	0.306212	0.643	0.458	4.86563e-146	1	CTNND1
2.71851e-149	0.303226	0.409	0.25	4.62256e-145	1	NUDT16
3.33941e-149	0.260552	0.297	0.158	5.67834e-145	1	BIN3
4.56113e-149	0.282823	0.355	0.205	7.75575e-145	1	NARF
9.43287e-149	0.279263	0.369	0.214	1.60397e-144	1	PHKB
1.83886e-147	0.260455	0.321	0.176	3.1268e-143	1	DPP8
6.35038e-147	0.338761	0.61	0.448	1.07982e-142	1	ADAR
1.77966e-146	0.292549	0.435	0.269	3.02614e-142	1	NUDT14
1.85461e-146	0.261466	0.526	0.341	3.15357e-142	1	SKAP2
7.03934e-146	0.382678	0.538	0.375	1.19697e-141	1	H1-10
1.10471e-145	0.311013	0.731	0.571	1.87845e-141	1	RAP1B
1.30753e-145	0.299317	0.866	0.749	2.22332e-141	1	YWHAB
2.33442e-144	0.253618	0.355	0.198	3.96944e-140	1	MYLIP
7.29506e-144	0.364864	0.564	0.401	1.24045e-139	1	SLC38A2
2.2877e-143	0.327987	0.486	0.325	3.89001e-139	1	FEZ2
8.37818e-143	0.476373	0.805	0.708	1.42463e-138	1	MCL1
1.03416e-142	0.356298	0.705	0.554	1.75849e-138	1	PSMB5
4.06768e-141	0.523267	0.467	0.32	6.91669e-137	1	IVNS1ABP
9.19711e-141	0.317322	0.548	0.382	1.56388e-136	1	SYNCRIP
4.00001e-140	0.316178	0.551	0.386	6.80162e-136	1	DYNC1LI2
1.5483e-139	0.30528	0.394	0.241	2.63273e-135	1	FURIN
2.41714e-139	0.343804	0.461	0.311	4.1101e-135	1	MRPL17
4.55483e-139	0.304668	0.434	0.276	7.74503e-135	1	ATL3
7.032e-139	0.260559	0.313	0.174	1.19572e-134	1	KIF1C
1.23693e-137	0.262693	0.315	0.177	2.10328e-133	1	RNF4
1.55854e-137	0.266009	0.451	0.285	2.65015e-133	1	BAZ2B
2.66695e-137	0.295175	0.431	0.273	4.53489e-133	1	AIDA
7.10214e-137	0.294781	0.495	0.329	1.20765e-132	1	NUDT3
1.64684e-136	0.254397	0.346	0.198	2.80028e-132	1	ZMIZ1
5.06424e-136	0.471664	0.297	0.168	8.61123e-132	1	SLC6A6
5.12264e-135	0.268804	0.343	0.198	8.71054e-131	1	MIDEAS
3.50249e-134	0.425949	0.825	0.706	5.95563e-130	1	CD9
6.4742e-134	0.263058	0.465	0.298	1.10087e-129	1	MPRIP
7.05614e-134	0.292659	0.515	0.349	1.19983e-129	1	CYB5B
7.89849e-134	0.28171	0.515	0.348	1.34306e-129	1	RSU1
1.49088e-133	0.252759	0.417	0.255	2.53509e-129	1	IFI44
1.39228e-131	0.311208	0.67	0.509	2.36743e-127	1	SFPQ
1.61458e-131	0.285366	0.497	0.332	2.74543e-127	1	MGAT1
2.45692e-131	0.332426	0.855	0.768	4.17774e-127	1	SRSF5
2.67824e-131	0.267676	0.385	0.236	4.55408e-127	1	ACTR1A
6.52798e-131	0.272486	0.444	0.283	1.11002e-126	1	PER1
1.59365e-130	0.29122	0.501	0.342	2.70985e-126	1	EIF4G1
1.63532e-130	0.300481	0.572	0.408	2.7807e-126	1	NSRP1
2.02586e-130	0.297898	0.718	0.569	3.44477e-126	1	CAMTA1
1.96512e-129	0.253078	0.374	0.225	3.34149e-125	1	TNKS1BP1
2.17389e-129	0.294594	0.608	0.427	3.69649e-125	1	PDCD4
3.10396e-129	0.265448	0.448	0.291	5.27797e-125	1	VOPP1
2.36539e-127	0.258664	0.433	0.278	4.0221e-123	1	PEF1
2.63124e-127	0.303218	0.532	0.372	4.47417e-123	1	TMEM30A
2.88169e-127	0.43238	0.34	0.206	4.90002e-123	1	TRIB1
3.85493e-127	0.267535	0.506	0.343	6.55491e-123	1	SNAP23
4.7474e-127	0.285981	0.539	0.37	8.07248e-123	1	RCN1
8.19301e-127	0.281948	0.409	0.26	1.39314e-122	1	CORO1C
1.67575e-126	0.288358	0.457	0.304	2.84944e-122	1	NUMB
2.01769e-126	0.289656	0.52	0.362	3.43088e-122	1	NEMF
7.03436e-126	0.250737	0.339	0.2	1.19612e-121	1	SAV1
3.72184e-125	0.349608	0.393	0.25	6.32862e-121	1	TMEM70
3.72809e-125	0.306826	0.489	0.333	6.33924e-121	1	PCMTD1
1.57925e-124	0.291088	0.862	0.759	2.68536e-120	1	CDC42
7.48385e-124	0.31449	0.583	0.428	1.27255e-119	1	NAA10
1.12785e-123	0.282995	0.899	0.799	1.9178e-119	1	GNG5
1.2243e-123	0.300083	0.586	0.425	2.0818e-119	1	TNRC6B
5.07708e-123	0.272292	0.444	0.292	8.63307e-119	1	HECTD1
1.05187e-122	0.275592	0.451	0.299	1.7886e-118	1	VAMP3
1.99808e-122	0.29812	0.735	0.598	3.39753e-118	1	SEPTIN2
3.07397e-122	0.294123	0.843	0.737	5.22697e-118	1	EIF4G2
3.16399e-122	0.275273	0.422	0.271	5.38004e-118	1	PLEKHA1
1.35805e-121	0.302395	0.58	0.428	2.30923e-117	1	PAXX
1.82226e-121	0.285043	0.553	0.395	3.09857e-117	1	ATF6B
3.79039e-121	0.253202	0.492	0.329	6.44518e-117	1	FLNB
8.60928e-121	0.264382	0.387	0.244	1.46392e-116	1	ELOVL1
3.74164e-120	0.250961	0.541	0.365	6.36229e-116	1	LIMA1
1.36317e-119	0.290189	0.507	0.359	2.31793e-115	1	YWHAG
6.1721e-119	0.282272	0.753	0.61	1.0495e-114	1	ATOX1
8.57208e-119	0.261983	0.403	0.257	1.4576e-114	1	PPP2R2A
1.91983e-118	0.259858	0.392	0.248	3.26447e-114	1	BIRC6
2.85925e-118	0.262573	0.38	0.239	4.86187e-114	1	SMAD5
5.2515e-118	0.290394	0.58	0.426	8.92966e-114	1	ARID4B
1.01684e-117	0.280876	0.839	0.741	1.72904e-113	1	RBM39
2.96536e-116	0.261448	0.431	0.283	5.04229e-112	1	PRKAA1
5.50682e-116	0.295073	0.534	0.388	9.3638e-112	1	ANKRD11
1.94477e-115	0.261867	0.433	0.285	3.30689e-111	1	UPF3A
1.3487e-113	0.264196	0.305	0.178	2.29333e-109	1	CBLB
1.18994e-112	0.284977	0.505	0.356	2.02338e-108	1	DYNC1H1
4.61825e-112	0.261296	0.507	0.355	7.85288e-108	1	PAK2
4.95759e-112	0.282522	0.492	0.345	8.42989e-108	1	C5orf24
6.9276e-112	0.26994	0.426	0.285	1.17797e-107	1	MRPL9
8.65246e-112	0.290438	0.759	0.642	1.47126e-107	1	MTDH
2.83533e-111	0.285716	0.701	0.565	4.82119e-107	1	PRRC2C
8.64034e-111	0.255917	0.422	0.277	1.4692e-106	1	ADAM10
1.15795e-109	0.266712	0.769	0.639	1.96898e-105	1	RBM8A
4.12762e-109	0.287272	0.67	0.528	7.0186e-105	1	CCNL1
7.00189e-109	0.270324	0.504	0.357	1.1906e-104	1	SIGIRR
1.98472e-108	0.281615	0.549	0.4	3.37482e-104	1	VCP
2.01258e-108	0.277698	0.644	0.503	3.4222e-104	1	RAP1A
3.8647e-108	0.260172	0.391	0.254	6.57153e-104	1	CHIC2
4.74127e-108	0.27351	0.362	0.228	8.06205e-104	1	OSBPL1A
3.83467e-107	0.305806	0.556	0.415	6.52048e-103	1	POLE4
4.2188e-107	0.288106	0.404	0.261	7.17366e-103	1	JAG1
9.88405e-107	0.269997	0.511	0.367	1.68068e-102	1	YTHDF2
1.91693e-106	0.257509	0.474	0.328	3.25955e-102	1	MYO1C
3.48156e-106	0.271984	0.765	0.629	5.92004e-102	1	EIF5B
5.87708e-103	0.257356	0.682	0.537	9.99338e-99	1	PSMB8
1.30114e-102	0.250767	0.599	0.452	2.21245e-98	1	CLK1
1.36494e-102	0.266804	0.657	0.521	2.32094e-98	1	RBM25
2.1296e-102	0.265403	0.643	0.497	3.62118e-98	1	NFE2L2
3.68438e-101	0.268604	0.519	0.377	6.26492e-97	1	XRN2
3.27883e-100	0.257748	0.559	0.41	5.57531e-96	1	PHF14
7.39805e-99	0.258063	0.461	0.325	1.25796e-94	1	ZC3H11A
1.57702e-97	0.256971	0.536	0.396	2.68156e-93	1	PTBP1
9.13373e-97	0.259124	0.818	0.72	1.5531e-92	1	SNU13
1.26029e-96	0.266096	0.543	0.401	2.14299e-92	1	SLC39A1
2.86398e-96	0.258794	0.667	0.535	4.86991e-92	1	DNAJA1
6.48279e-96	0.273725	0.375	0.249	1.10233e-91	1	DAAM1
1.64243e-94	0.25984	0.846	0.735	2.79278e-90	1	CALR
3.91232e-94	0.286881	0.298	0.183	6.65251e-90	1	INSIG1
7.89322e-94	0.272785	0.526	0.394	1.34216e-89	1	NDUFA8
4.58397e-93	0.251165	0.662	0.529	7.79457e-89	1	HNRNPD
2.50131e-90	0.254493	0.32	0.201	4.25323e-86	1	FAM118A
8.41658e-89	0.37278	0.517	0.386	1.43116e-84	1	TFPI
1.79925e-88	0.276502	0.727	0.608	3.05945e-84	1	ELOC
5.43965e-78	0.513294	0.33	0.224	9.24958e-74	1	ADM
1.80612e-76	0.964028	0.295	0.199	3.07113e-72	1	AKAP12
2.11727e-76	0.25172	0.719	0.604	3.6002e-72	1	SRSF7
7.0479e-70	0.32826	0.677	0.567	1.19843e-65	1	RHOB
3.61927e-69	0.285132	0.805	0.704	6.1542e-65	1	KLF6
1.36505e-59	0.387363	0.45	0.358	2.32113e-55	1	NR2F2
4.11968e-52	0.355868	0.734	0.656	7.0051e-48	1	PPA1
1.51165e-46	0.493911	0.475	0.391	2.57041e-42	1	FOSB
7.77779e-30	0.285716	0.255	0.19	1.32253e-25	1	TNFAIP3
0.000209756	0.252621	0.331	0.37	1	1	CPE
0	4.35811	0.776	0.357	0	2	APOC1
0	4.09937	0.99	0.264	0	2	TYROBP
0	3.84653	0.973	0.239	0	2	FCER1G
0	3.55011	0.795	0.504	0	2	APOE
0	3.41409	0.649	0.154	0	2	C1QA
0	3.39971	0.945	0.139	0	2	AIF1
0	3.37306	0.528	0.156	0	2	S100A8
0	3.36736	0.602	0.14	0	2	C1QB
0	3.28703	0.991	0.717	0	2	HLA-DRA
0	3.2478	0.579	0.075	0	2	C1QC
0	3.16431	0.967	0.556	0	2	HLA-DPA1
0	3.14484	1	0.993	0	2	FTL
0	3.11666	0.65	0.215	0	2	S100A9
0	3.10369	0.962	0.595	0	2	HLA-DPB1
0	2.89198	0.808	0.299	0	2	RGS1
0	2.89078	0.855	0.241	0	2	HLA-DQA1
0	2.80446	0.977	0.636	0	2	HLA-DRB1
0	2.7865	0.773	0.082	0	2	MS4A6A
0	2.71665	0.906	0.375	0	2	HLA-DQB1
0	2.61115	0.715	0.133	0	2	CD14
0	2.58149	0.829	0.189	0	2	CD68
0	2.5568	0.876	0.114	0	2	LST1
0	2.48625	0.759	0.182	0	2	ALOX5AP
0	2.47161	0.976	0.519	0	2	SRGN
0	2.44392	0.992	0.791	0	2	GPX1
0	2.44237	0.928	0.399	0	2	CTSS
0	2.38957	0.937	0.481	0	2	LYZ
0	2.38786	0.997	0.888	0	2	CD74
0	2.36116	0.845	0.111	0	2	C1orf162
0	2.35228	0.843	0.673	0	2	CTSD
0	2.34764	0.915	0.619	0	2	CTSB
0	2.25531	0.869	0.169	0	2	ITGB2
0	2.25428	0.981	0.757	0	2	NPC2
0	2.19622	0.956	0.305	0	2	LAPTM5
0	2.15586	0.398	0.148	0	2	CCL3
0	2.15125	0.566	0.218	0	2	GPNMB
0	2.12833	0.711	0.043	0	2	MNDA
0	2.10462	0.911	0.502	0	2	TYMP
0	2.05616	0.603	0.057	0	2	FCGR3A
0	2.05545	0.556	0.043	0	2	TREM2
0	2.0403	0.973	0.853	0	2	PSAP
0	2.00271	0.803	0.068	0	2	SPI1
0	1.995	0.702	0.048	0	2	MS4A7
0	1.9614	0.863	0.38	0	2	CAPG
0	1.90993	0.69	0.093	0	2	RNASE6
0	1.89086	0.637	0.122	0	2	GPR183
0	1.88777	0.877	0.409	0	2	HLA-DMA
0	1.87753	0.617	0.212	0	2	RGS2
0	1.8687	0.881	0.364	0	2	COTL1
0	1.86266	0.621	0.06	0	2	CD163
0	1.85731	0.805	0.205	0	2	HCST
0	1.80774	0.56	0.036	0	2	VSIG4
0	1.80524	0.736	0.134	0	2	CSTA
0	1.80027	0.792	0.204	0	2	RGS10
0	1.78748	0.601	0.02	0	2	IGSF6
0	1.7768	0.922	0.606	0	2	GRN
0	1.76306	0.678	0.061	0	2	FCGR2A
0	1.76068	0.334	0.147	0	2	CXCL8
0	1.75454	0.74	0.199	0	2	HLA-DMB
0	1.67404	0.99	0.846	0	2	SAT1
0	1.66933	0.478	0.111	0	2	ACP5
0	1.66494	0.573	0.098	0	2	SLC11A1
0	1.65939	1	0.999	0	2	FTH1
0	1.64363	0.568	0.033	0	2	IFI30
0	1.64325	0.993	0.84	0	2	CYBA
0	1.63454	0.548	0.036	0	2	MS4A4A
0	1.63141	0.791	0.211	0	2	LSP1
0	1.60864	0.646	0.296	0	2	PLAUR
0	1.59534	0.96	0.628	0	2	S100A4
0	1.59012	0.579	0.117	0	2	MAFB
0	1.56835	0.546	0.054	0	2	CPVL
0	1.56146	0.608	0.047	0	2	CYBB
0	1.5605	0.569	0.262	0	2	LIPA
0	1.55887	0.408	0.072	0	2	HLA-DQA2
0	1.54766	0.478	0.03	0	2	OLR1
0	1.5359	0.994	0.9	0	2	CST3
0	1.52727	0.577	0.216	0	2	PLIN2
0	1.522	0.295	0.028	0	2	FCN1
0	1.51686	0.274	0.022	0	2	MARCO
0	1.48875	0.847	0.435	0	2	RNASET2
0	1.48018	0.821	0.383	0	2	CXCR4
0	1.47815	0.454	0.058	0	2	BCL2A1
0	1.45866	0.482	0.035	0	2	MSR1
0	1.45717	0.259	0.025	0	2	RETN
0	1.45229	0.801	0.458	0	2	CTSC
0	1.42107	0.515	0.025	0	2	FPR1
0	1.41328	0.53	0.064	0	2	CALHM6
0	1.40338	0.799	0.185	0	2	CD53
0	1.3994	0.606	0.049	0	2	CLEC7A
0	1.3822	0.774	0.535	0	2	ASAH1
0	1.37389	0.452	0.051	0	2	FCGR2B
0	1.37266	0.983	0.819	0	2	SH3BGRL3
0	1.36286	0.564	0.044	0	2	CSF1R
0	1.3491	0.512	0.194	0	2	FBP1
0	1.34023	0.56	0.091	0	2	FGL2
0	1.33919	0.697	0.138	0	2	LCP1
0	1.33725	0.696	0.408	0	2	CTSZ
0	1.32275	0.918	0.811	0	2	CSTB
0	1.31935	0.878	0.674	0	2	ATP6V1F
0	1.31504	0.552	0.032	0	2	CD86
0	1.29967	0.668	0.208	0	2	TGFBI
0	1.2816	0.882	0.69	0	2	GLUL
0	1.27895	0.664	0.246	0	2	CXCL16
0	1.27854	0.591	0.066	0	2	LY86
0	1.27178	0.535	0.09	0	2	SAMSN1
0	1.26537	0.311	0.016	0	2	CLEC10A
0	1.2477	0.552	0.096	0	2	TNFSF13B
0	1.23839	0.452	0.021	0	2	FCGR1A
0	1.23495	0.809	0.463	0	2	EMP3
0	1.22927	0.512	0.05	0	2	NCF2
0	1.21945	0.608	0.107	0	2	FYB1
0	1.2186	0.538	0.038	0	2	HAVCR2
0	1.19831	0.704	0.343	0	2	PPT1
0	1.18662	0.475	0.028	0	2	C3AR1
0	1.18375	0.656	0.206	0	2	LY96
0	1.18131	0.627	0.109	0	2	EVI2B
0	1.17963	0.643	0.151	0	2	HCLS1
0	1.17144	0.434	0.061	0	2	HMOX1
0	1.16428	0.651	0.213	0	2	SAMHD1
0	1.1633	0.756	0.363	0	2	PYCARD
0	1.15746	0.623	0.224	0	2	AP1S2
0	1.15731	0.828	0.354	0	2	GMFG
0	1.13246	0.702	0.307	0	2	RNF130
0	1.12783	0.414	0.062	0	2	JAML
0	1.12586	0.444	0.029	0	2	CSF2RA
0	1.12397	0.77	0.491	0	2	CKLF
0	1.12303	0.708	0.297	0	2	CYRIB
0	1.11937	0.343	0.023	0	2	GPR34
0	1.09768	0.913	0.614	0	2	VAMP8
0	1.08245	0.608	0.177	0	2	GLIPR1
0	1.08229	0.451	0.018	0	2	LILRB4
0	1.08059	0.97	0.841	0	2	ARPC3
0	1.07896	0.505	0.059	0	2	LAIR1
0	1.06862	0.369	0.026	0	2	C5AR1
0	1.06385	0.631	0.214	0	2	KCTD12
0	1.05933	0.676	0.157	0	2	PTPRC
0	1.05624	0.969	0.736	0	2	LGALS1
0	1.04008	0.562	0.119	0	2	ARRB2
0	1.03211	0.567	0.14	0	2	CELF2
0	1.03041	0.99	0.938	0	2	OAZ1
0	1.01976	0.627	0.258	0	2	SLC16A3
0	1.01664	0.728	0.424	0	2	IFNGR1
0	1.01594	0.815	0.626	0	2	GSTO1
0	1.01406	1	0.993	0	2	ACTB
0	1.00551	0.285	0.012	0	2	PLA2G7
0	1.0036	0.516	0.089	0	2	EVI2A
0	1.00031	0.401	0.034	0	2	SLC1A3
0	0.993965	0.494	0.138	0	2	SNX10
0	0.993363	0.374	0.017	0	2	FPR3
0	0.988659	0.912	0.555	0	2	ARHGDIB
0	0.987926	0.557	0.207	0	2	ATP6V1B2
0	0.982543	0.8	0.543	0	2	MACROH2A1
0	0.97883	0.593	0.321	0	2	C15orf48
0	0.977356	0.743	0.2	0	2	CD37
0	0.956417	0.569	0.237	0	2	MFSD1
0	0.955491	0.448	0.059	0	2	TBXAS1
0	0.953298	0.646	0.2	0	2	GPSM3
0	0.950687	0.333	0.027	0	2	TREM1
0	0.949065	0.336	0.023	0	2	CLEC5A
0	0.948456	0.818	0.601	0	2	AP2S1
0	0.943828	0.651	0.319	0	2	RHOG
0	0.939989	0.43	0.05	0	2	CD84
0	0.936749	0.403	0.016	0	2	PILRA
0	0.930215	0.617	0.311	0	2	GLRX
0	0.929946	0.81	0.593	0	2	FCGRT
0	0.928809	0.834	0.635	0	2	ATP6V0B
0	0.927545	0.385	0.038	0	2	PLEK
0	0.923367	0.428	0.061	0	2	FGR
0	0.922553	0.422	0.025	0	2	HCK
0	0.922325	0.405	0.042	0	2	TLR2
0	0.909098	0.365	0.044	0	2	SLCO2B1
0	0.903261	0.991	0.944	0	2	PFN1
0	0.899222	0.442	0.066	0	2	SLC31A2
0	0.896318	0.434	0.049	0	2	MARCHF1
0	0.89267	0.628	0.32	0	2	TPP1
0	0.885967	0.508	0.249	0	2	STXBP2
0	0.880313	0.995	0.935	0	2	S100A11
0	0.876757	0.586	0.205	0	2	RAB31
0	0.876402	0.503	0.144	0	2	ZEB2
0	0.874996	0.431	0.058	0	2	THEMIS2
0	0.873476	0.626	0.303	0	2	CNPY3
0	0.872537	0.435	0.077	0	2	LCP2
0	0.868963	0.471	0.09	0	2	SLA
0	0.867061	0.456	0.093	0	2	MYO1F
0	0.86283	0.843	0.681	0	2	SDCBP
0	0.857647	0.44	0.107	0	2	SLC7A7
0	0.857538	0.419	0.068	0	2	CD4
0	0.856161	0.537	0.301	0	2	CREG1
0	0.856154	0.582	0.184	0	2	UCP2
0	0.856003	0.829	0.662	0	2	CEBPB
0	0.855686	0.299	0.036	0	2	PHACTR1
0	0.84442	0.357	0.023	0	2	CSF3R
0	0.836843	0.707	0.25	0	2	CORO1A
0	0.835424	0.648	0.404	0	2	SGK1
0	0.834236	0.515	0.171	0	2	PLXDC2
0	0.831983	0.576	0.263	0	2	LGALS9
0	0.831754	0.658	0.398	0	2	LIMS1
0	0.830531	0.384	0.051	0	2	ADA2
0	0.824124	0.576	0.302	0	2	VSIR
0	0.824013	0.335	0.092	0	2	GM2A
0	0.815463	0.625	0.314	0	2	CARD16
0	0.811827	0.839	0.657	0	2	GABARAP
0	0.799239	0.714	0.391	0	2	CD52
0	0.79638	0.427	0.148	0	2	IL18
0	0.795663	0.432	0.128	0	2	GLIPR2
0	0.795381	0.893	0.696	0	2	ARPC1B
0	0.792267	0.549	0.272	0	2	GRB2
0	0.790267	0.269	0.024	0	2	PLD4
0	0.790059	0.272	0.018	0	2	CLEC4E
0	0.778726	0.361	0.024	0	2	CD300A
0	0.778358	1	1	0	2	TMSB4X
0	0.774585	0.328	0.024	0	2	CLEC4A
0	0.772617	0.395	0.133	0	2	ACSL1
0	0.763822	0.433	0.142	0	2	CD302
0	0.762691	0.347	0.071	0	2	GK
0	0.761815	0.574	0.336	0	2	GRINA
0	0.760597	0.794	0.558	0	2	CTSH
0	0.756819	0.385	0.115	0	2	OGFRL1
0	0.756413	0.874	0.703	0	2	ARPC5
0	0.7464	0.251	0.025	0	2	IL4I1
0	0.744816	0.983	0.758	0	2	VIM
0	0.742497	0.728	0.534	0	2	LITAF
0	0.732847	0.418	0.074	0	2	WAS
0	0.726996	0.264	0.102	0	2	CYP27A1
0	0.724531	0.486	0.171	0	2	PTPN6
0	0.724149	1	0.997	0	2	TMSB10
0	0.723469	0.424	0.135	0	2	CCDC88A
0	0.718406	0.417	0.137	0	2	TNFRSF1B
0	0.715752	0.956	0.842	0	2	EIF4A1
0	0.707076	0.541	0.288	0	2	UPP1
0	0.706322	0.427	0.176	0	2	SMAP2
0	0.704801	0.47	0.261	0	2	AKR1B1
0	0.703025	0.287	0.02	0	2	MPEG1
0	0.699908	0.278	0.019	0	2	CLEC12A
0	0.699132	0.297	0.061	0	2	CD83
0	0.698862	0.38	0.083	0	2	FMNL1
0	0.695347	0.364	0.056	0	2	LAT2
0	0.690656	0.486	0.268	0	2	REL
0	0.690093	0.384	0.065	0	2	PARVG
0	0.684545	0.91	0.775	0	2	GPX4
0	0.680002	0.548	0.337	0	2	RNF149
0	0.679949	0.625	0.415	0	2	RBPJ
0	0.679647	0.756	0.554	0	2	CD44
0	0.674234	0.362	0.086	0	2	ALOX5
0	0.670975	0.277	0.017	0	2	CCR1
0	0.670376	0.417	0.141	0	2	LYN
0	0.668894	0.316	0.073	0	2	SLC15A3
0	0.667729	0.273	0.026	0	2	NPL
0	0.667621	0.442	0.118	0	2	CD48
0	0.666147	0.285	0.027	0	2	ITGAX
0	0.662047	0.377	0.11	0	2	SIRPA
0	0.661248	0.969	0.914	0	2	YBX1
0	0.65731	0.293	0.032	0	2	ITGAM
0	0.656489	0.363	0.143	0	2	PTPRE
0	0.647796	0.25	0.009	0	2	RGS18
0	0.647432	0.474	0.25	0	2	GCA
0	0.646607	0.549	0.328	0	2	MGAT1
0	0.645335	0.993	0.976	0	2	ATP5F1E
0	0.643406	0.436	0.178	0	2	CASP1
0	0.639711	0.368	0.111	0	2	BASP1
0	0.639352	0.34	0.069	0	2	RIN3
0	0.637581	0.393	0.105	0	2	FERMT3
0	0.636688	0.839	0.596	0	2	ANXA1
0	0.636295	0.312	0.077	0	2	KYNU
0	0.635589	0.29	0.116	0	2	ZNF331
0	0.635555	0.32	0.038	0	2	NCKAP1L
0	0.631657	0.585	0.332	0	2	ABRACL
0	0.624497	0.278	0.015	0	2	SLAMF8
0	0.620605	0.589	0.381	0	2	IFNGR2
0	0.614104	0.371	0.107	0	2	DOCK8
0	0.611985	0.347	0.068	0	2	APBB1IP
0	0.611615	0.278	0.011	0	2	LRRC25
0	0.604249	0.486	0.255	0	2	ARHGAP18
0	0.604066	0.427	0.141	0	2	CYTIP
0	0.603523	0.296	0.042	0	2	RENBP
0	0.599825	0.611	0.333	0	2	CLEC2B
0	0.599731	0.905	0.813	0	2	ARPC2
0	0.598336	0.291	0.105	0	2	SERPINB9
0	0.596843	0.56	0.356	0	2	M6PR
0	0.587956	0.883	0.755	0	2	TSPO
0	0.587809	0.344	0.157	0	2	METRNL
0	0.585596	0.342	0.139	0	2	ALCAM
0	0.579	0.307	0.067	0	2	OTULINL
0	0.578808	0.371	0.159	0	2	PGD
0	0.578757	0.291	0.05	0	2	ZNF385A
0	0.576482	0.292	0.04	0	2	DOK2
0	0.570907	0.32	0.116	0	2	NUP214
0	0.568165	0.257	0.018	0	2	OSCAR
0	0.567765	0.899	0.596	0	2	FXYD5
0	0.566375	0.442	0.182	0	2	WIPF1
0	0.557683	0.35	0.118	0	2	NCF1
0	0.555448	0.283	0.073	0	2	SLC43A2
0	0.555105	0.35	0.111	0	2	RGS19
0	0.551628	0.284	0.049	0	2	TM6SF1
0	0.549099	0.292	0.063	0	2	PTAFR
0	0.548804	0.292	0.052	0	2	ADAP2
0	0.54616	0.31	0.088	0	2	DSE
0	0.543422	0.261	0.011	0	2	CD33
0	0.537513	0.436	0.225	0	2	ADPGK
0	0.537165	0.255	0.092	0	2	STAB1
0	0.537088	0.266	0.037	0	2	DOCK2
0	0.536628	0.987	0.946	0	2	CFL1
0	0.532928	0.257	0.039	0	2	SLC8A1
0	0.529572	0.306	0.061	0	2	NCF4
0	0.524653	0.329	0.105	0	2	FUOM
0	0.522922	0.333	0.129	0	2	PLEKHO1
0	0.519222	0.279	0.099	0	2	LHFPL2
0	0.515479	0.289	0.086	0	2	BCAT1
0	0.513724	0.263	0.038	0	2	GPR65
0	0.511522	1	0.999	0	2	B2M
0	0.510671	0.326	0.094	0	2	LPXN
0	0.497611	0.345	0.152	0	2	LACTB
0	0.486887	0.378	0.154	0	2	ABI3
0	0.484293	0.264	0.068	0	2	HACD4
0	0.475274	0.28	0.086	0	2	SYK
0	0.470743	0.254	0.036	0	2	IGFLR1
0	0.464755	0.26	0.05	0	2	IL10RA
0	0.438851	0.999	0.998	0	2	RPS24
0	0.434292	0.994	0.988	0	2	UBA52
0	0.43355	0.274	0.086	0	2	CHST11
0	0.427681	0.279	0.092	0	2	IRF8
0	0.412121	0.257	0.061	0	2	ARHGAP30
0	0.401726	0.458	0.201	0	2	RAC2
0	0.281952	1	0.998	0	2	RPL28
1.84291e-305	0.589756	0.626	0.433	3.13368e-301	2	MOB1A
2.47445e-302	0.642607	0.603	0.402	4.20756e-298	2	TKT
3.71435e-299	0.479878	0.312	0.133	6.31587e-295	2	LPCAT2
1.11204e-296	0.585144	0.456	0.255	1.8909e-292	2	CORO1C
8.80316e-294	0.467691	0.261	0.1	1.49689e-289	2	SAP30
1.73185e-293	0.915623	0.742	0.61	2.94484e-289	2	YWHAH
5.69428e-291	0.587317	0.567	0.372	9.68256e-287	2	RNF13
7.01315e-291	0.421138	0.287	0.117	1.19252e-286	2	NAGA
7.35394e-287	0.587666	0.571	0.385	1.25046e-282	2	ATP6AP1
2.97082e-285	0.291056	1	0.998	5.05159e-281	2	RPL39
1.94048e-284	0.755879	0.501	0.281	3.2996e-280	2	SLC2A3
7.5964e-284	0.358491	0.423	0.205	1.29169e-279	2	LIMD2
2.73784e-281	0.578199	0.638	0.429	4.65542e-277	2	ATP1B3
3.47058e-279	0.44636	0.991	0.963	5.90138e-275	2	GAPDH
3.06433e-273	0.492871	0.417	0.227	5.21058e-269	2	VMA21
1.62861e-272	0.525102	0.314	0.14	2.76929e-268	2	MAP3K8
3.62224e-266	0.674361	0.553	0.36	6.15926e-262	2	ALDH2
3.6963e-266	0.621643	0.849	0.756	6.28518e-262	2	DBI
2.0508e-262	0.462846	0.863	0.748	3.48718e-258	2	ENO1
1.12881e-259	0.406468	0.273	0.114	1.91943e-255	2	DPYD
3.36302e-259	0.582397	0.523	0.344	5.71847e-255	2	ATP6V0D1
8.8302e-259	0.650666	0.404	0.21	1.50149e-254	2	CPM
2.67053e-258	0.479155	0.312	0.145	4.54097e-254	2	GNA13
1.04025e-254	0.491686	0.664	0.468	1.76885e-250	2	GNAI2
1.695e-253	0.541546	0.675	0.502	2.88218e-249	2	ACTR2
2.5854e-251	0.45095	0.377	0.188	4.39622e-247	2	TGFB1
5.16125e-251	0.467214	0.405	0.214	8.77619e-247	2	RILPL2
1.81076e-250	0.524433	0.846	0.756	3.07901e-246	2	TUBA1B
2.68265e-248	0.473206	0.537	0.341	4.56157e-244	2	OSTF1
1.62838e-246	0.456708	0.859	0.752	2.7689e-242	2	SERP1
1.11575e-245	0.548625	0.62	0.442	1.89721e-241	2	CMTM6
1.6826e-245	0.430329	0.923	0.858	2.8611e-241	2	ATP6V0E1
1.57854e-242	0.674186	0.465	0.293	2.68415e-238	2	LTA4H
7.45379e-240	0.398638	0.353	0.17	1.26744e-235	2	MPP1
1.6945e-238	0.567137	0.506	0.316	2.88133e-234	2	SCPEP1
3.42937e-238	1.8793	0.599	0.501	5.83129e-234	2	CTSL
8.72887e-236	0.70539	0.762	0.648	1.48426e-231	2	PSME2
2.7139e-233	0.498757	0.428	0.253	4.61471e-229	2	NAGK
1.00065e-231	0.381562	0.939	0.867	1.7015e-227	2	CLIC1
8.51867e-231	0.32054	0.992	0.98	1.44851e-226	2	PFDN5
1.71584e-230	0.563735	0.527	0.36	2.91761e-226	2	HEXA
3.08927e-222	0.502885	0.654	0.502	5.25299e-218	2	RAP1A
4.25695e-222	0.445242	0.322	0.162	7.23852e-218	2	GAA
3.82891e-220	0.469635	0.444	0.272	6.51068e-216	2	TWF2
4.71625e-220	0.552789	0.589	0.409	8.01951e-216	2	FKBP5
2.46411e-219	0.575269	0.675	0.54	4.18998e-215	2	TALDO1
1.79006e-218	0.565732	0.54	0.364	3.04381e-214	2	EPSTI1
2.07819e-216	2.73225	0.74	0.659	3.53375e-212	2	SPP1
6.40344e-215	0.477229	0.445	0.274	1.08884e-210	2	SQOR
4.73046e-213	0.488985	0.726	0.593	8.04368e-209	2	DRAP1
5.03236e-211	0.477844	0.782	0.662	8.55702e-207	2	CAP1
7.26113e-211	0.40157	0.894	0.813	1.23468e-206	2	RHOA
1.75487e-208	0.513035	0.43	0.266	2.98398e-204	2	UBE2D1
5.45352e-207	0.497615	0.432	0.265	9.27316e-203	2	IL13RA1
8.05008e-205	0.629934	0.596	0.46	1.36884e-200	2	CTSA
9.76129e-205	0.488682	0.457	0.279	1.65981e-200	2	EFHD2
7.33187e-200	0.571325	0.623	0.482	1.24671e-195	2	HEXB
8.09204e-200	0.324318	0.674	0.518	1.37597e-195	2	HMGB2
5.13033e-196	0.580688	0.388	0.209	8.72361e-192	2	VCAN
6.03676e-196	0.466577	0.505	0.344	1.02649e-191	2	CIAO2A
9.51813e-196	0.567993	0.894	0.792	1.61846e-191	2	FOS
5.00384e-194	0.452401	0.464	0.296	8.50854e-190	2	PSMB10
1.57525e-193	0.537087	0.385	0.224	2.67856e-189	2	STK17B
5.8546e-193	0.823447	0.74	0.664	9.95516e-189	2	HERPUD1
8.89752e-193	0.380866	0.435	0.258	1.51293e-188	2	PPP1R18
4.24691e-189	0.358274	0.257	0.119	7.22145e-185	2	IRAK3
5.83263e-189	0.473018	0.608	0.469	9.9178e-185	2	ARPC4
[truncated: 23,932 more rows]
