# Supplementary material for: A Ductal-Cell-Related Risk Model Integrating Single-Cell and Bulk Sequencing Data Predicts the Prognosis of Patients With Pancreatic Adenocarcinoma
Source: Front Genet. 2022 Jan 3;12:763636. doi: 10.3389/fgene.2021.763636 (PMC8762279; doi:10.3389/fgene.2021.763636)
Supplement: Supplementary file 3 [file Table4.XLS]

## Sheet: multiCox
Supplementary Table 4. Multivariate Cox regression results of PDAC survival related genes
Gene	coef	HR	HR.95L	HR.95H	p.value
LY6D	0.108531	1.11464	1.03746	1.19756	0.00303252
EPS8	0.676585	1.96715	1.26454	3.06015	0.00269085
DDIT4	0.475844	1.60937	1.24592	2.07885	0.000268957
TNFSF10	0.412035	1.50989	1.11605	2.0427	0.00754027
RBP4	-0.150475	0.860299	0.722681	1.02412	0.0906594
NPY1R	-0.181655	0.833889	0.71775	0.96882	0.0176006
MYADM	-0.548723	0.577687	0.396709	0.841227	0.00421498
SLC12A2	-0.426967	0.652485	0.496669	0.857183	0.00216303
SPCS3	1.03894	2.82623	1.45553	5.48773	0.00215003
NBPF15	-0.420269	0.65687	0.483412	0.892568	0.00722145
