# Supplementary material for: A Ductal-Cell-Related Risk Model Integrating Single-Cell and Bulk Sequencing Data Predicts the Prognosis of Patients With Pancreatic Adenocarcinoma
Source: Front Genet. 2022 Jan 3;12:763636. doi: 10.3389/fgene.2021.763636 (PMC8762279; doi:10.3389/fgene.2021.763636)
Supplement: Supplementary file 4 [file Table2.XLS]

## Sheet: supplementary table 2
Supplementary table2. The reference gene markers of different celltype
Gene	Celltype
MMP7	Ductal cell
KRT7	Ductal cell
LCN2	Ductal cell
CFTR	Ductal cell
KRT19	Ductal cell
TSPAN8	Ductal cell
SOX9	Ductal cell
AMBP	Ductal cell
SLPI	Ductal cell
PRSS1	Acinar cell
CTRB1	Acinar cell
CTRB2	Acinar cell
REG1B	Acinar cell
CELA3A	Acinar cell
PRSS2	Acinar cell
REG3A	Acinar cell
CPA1	Acinar cell
CLPS	Acinar cell
CHGB	Endocrine cell
CHGA	Endocrine cell
INS	Endocrine cell
IAPP	Endocrine cell
RGS5	Stellate cell
ACTA2	Stellate cell
PDGFRB	Stellate cell
ADIRF	Stellate cell
C11orf96	Stellate cell
CSRP2	Stellate cell
LUM	Fibroblast
DCN	Fibroblast
COL1A1	Fibroblast
CDH5	Endothelial cell
PLVAP	Endothelial cell
VWF	Endothelial cell
CLDN5	Endothelial cell
RGCC	Endothelial cell
ENG	Endothelial cell
AIF1	Macrophage
CD64	Macrophage
CD14	Macrophage
CD68	Macrophage
CD3D	T cell
CD3E	T cell
CD4	T cell
CD8	T cell
MS4A1	B cell
CD79A	B cell
CD79B	B cell
CD52	B cell
