# Supplementary material for: A Ductal-Cell-Related Risk Model Integrating Single-Cell and Bulk Sequencing Data Predicts the Prognosis of Patients With Pancreatic Adenocarcinoma
Source: Front Genet. 2022 Jan 3;12:763636. doi: 10.3389/fgene.2021.763636 (PMC8762279; doi:10.3389/fgene.2021.763636)
Supplement: Supplementary file 10 [file Table3.XLS]

## Sheet: dfmakers_ductal_cell_logFC.5
Supplementary Table 3. Differentially Expressed Genes
gene	p_val	avg_log2FC	pct.1	pct.2
HES4	0	-1.48081	0.448	0.761
ISG15	0	2.06108	0.763	0.214
TNFRSF14	0	0.550172	0.5	0.115
FBXO2	0	0.532673	0.308	0.047
EFHD2	0	0.94783	0.571	0.078
AKR7A3	0	0.75404	0.393	0.027
CAMK2N1	0	1.63454	0.729	0.075
CDA	0	0.639367	0.256	0.007
TCEA3	0	-0.846157	0.439	0.653
GALE	0	0.717899	0.518	0.073
SH3BGRL3	0	2.00037	0.946	0.53
CD52	0	0.685006	0.406	0.054
HMGN2	0	-0.95852	0.811	0.927
SFN	0	1.58803	0.633	0.002
IFI6	0	2.10883	0.872	0.458
SERINC2	0	0.977185	0.75	0.281
TINAGL1	0	0.514541	0.647	0.346
PTP4A2	0	0.507867	0.754	0.442
MARCKSL1	0	1.67735	0.839	0.246
TMEM54	0	0.789053	0.598	0.183
CITED4	0	-1.36476	0.421	0.777
SLC2A1	0	0.825896	0.444	0.061
TSPAN1	0	2.06128	0.717	0.013
PDZK1IP1	0	1.74378	0.814	0.412
OSBPL9	0	-0.725341	0.363	0.525
TMEM59	0	-0.526287	0.95	0.948
JUN	0	-1.29412	0.856	0.926
FGGY	0	-1.18009	0.301	0.669
NFIA	0	-0.68773	0.485	0.618
IFI44L	0	0.980524	0.423	0.05
IFI44	0	0.575316	0.431	0.087
TTLL7	0	-0.639943	0.129	0.379
CCN1	0	-1.61194	0.355	0.656
LMO4	0	0.978297	0.666	0.305
GBP2	0	0.626443	0.435	0.047
RPL5	0	-0.670894	0.985	0.996
F3	0	0.912347	0.419	0.051
SLC44A3	0	-0.850947	0.307	0.546
CNN3	0	-1.30816	0.549	0.859
AMY2B	0	-0.714923	0.07	0.291
VAV3	0	-0.77423	0.084	0.384
EPS8L3	0	0.754703	0.416	0.002
AHCYL1	0	-0.920405	0.552	0.687
CAPZA1	0	0.5867	0.675	0.28
RHOC	0	0.709763	0.885	0.627
BCL2L15	0	0.623469	0.381	0.005
ATP1A1	0	-1.53813	0.936	0.991
VTCN1	0	-0.682882	0.112	0.36
PHGDH	0	-1.21998	0.181	0.633
REG4	0	2.95219	0.319	0.01
NBPF10	0	-0.924075	0.392	0.588
MTMR11	0	0.717662	0.43	0.025
ECM1	0	0.57861	0.2	0.006
MCL1	0	-0.67964	0.804	0.795
CTSS	0	0.922347	0.653	0.206
ANXA9	0	-1.124	0.166	0.577
S100A11	0	1.89291	0.997	0.941
S100A9	0	1.93067	0.347	0.013
S100A8	0	0.850091	0.23	0.008
S100A6	0	3.76517	0.999	0.914
S100A4	0	2.8601	0.802	0.13
S100A2	0	1.3813	0.304	0.025
S100A16	0	1.02192	0.815	0.461
S100A14	0	1.16796	0.755	0.459
S100A13	0	-0.958471	0.874	0.917
S100A1	0	-0.752414	0.071	0.283
TPM3	0	0.577765	0.801	0.493
MUC1	0	2.84466	0.853	0.063
CRABP2	0	1.61926	0.347	0.011
IFI16	0	0.679013	0.512	0.107
TAGLN2	0	1.20356	0.938	0.66
LINC01133	0	1.43192	0.532	0.017
PFDN2	0	0.609528	0.785	0.48
RGS5	0	0.556054	0.312	0.078
PBX1	0	-0.926177	0.414	0.663
MPC2	0	-0.684066	0.745	0.807
ATP1B1	0	-0.685352	0.932	0.95
ANGPTL1	0	-0.68509	0.047	0.319
SOAT1	0	-0.868047	0.262	0.538
GLUL	0	-1.09988	0.75	0.876
LAMC2	0	1.11966	0.502	0.044
CFH	0	0.571384	0.346	0.045
ELF3	0	0.558116	0.944	0.782
NUAK2	0	-0.966101	0.057	0.341
CTSE	0	2.38826	0.683	0.022
PIGR	0	2.0128	0.676	0.145
CD55	0	1.41676	0.662	0.175
LAMB3	0	1.35302	0.631	0.057
G0S2	0	0.58753	0.213	0.022
PROX1	0	-1.20772	0.145	0.585
ESRRG	0	-0.529257	0.06	0.273
CAPN8	0	1.25399	0.56	0.003
CAPN2	0	0.721047	0.762	0.368
EPHX1	0	-0.805379	0.358	0.571
LEFTY1	0	-1.86172	0.222	0.824
ARF1	0	0.706639	0.898	0.621
GUK1	0	0.790135	0.945	0.764
KCNK1	0	1.0292	0.561	0.046
COX20	0	-0.727641	0.712	0.78
SH3YL1	0	-1.40055	0.719	0.914
ALKAL2	0	-1.51696	0.146	0.706
RPS7	0	-0.579348	0.989	0.995
ID2	0	-1.11882	0.601	0.803
CYS1	0	-0.926396	0.09	0.461
LAPTM4A	0	-0.782879	0.903	0.94
SDC1	0	0.835218	0.683	0.245
TRIM54	0	0.82121	0.401	0.007
KRTCAP3	0	0.535084	0.633	0.313
IFT172	0	0.902506	0.547	0.08
SLC3A1	0	-1.96232	0.317	0.842
RTN4	0	-0.799614	0.863	0.895
RPS27A	0	-0.740773	0.996	0.997
MEIS1	0	-0.657587	0.223	0.434
GFPT1	0	0.595063	0.532	0.173
ANXA4	0	-1.66112	0.959	0.999
MXD1	0	0.660524	0.343	0.039
SUCLG1	0	-0.757797	0.531	0.654
TMSB10	0	1.61649	1	0.997
CAPG	0	1.10784	0.725	0.256
FHL2	0	1.36974	0.588	0.011
SULT1C2	0	0.815879	0.374	0.065
MALL	0	1.09113	0.538	0.062
SCTR	0	-1.92475	0.315	0.882
GYPC	0	-1.21478	0.254	0.733
CXCR4	0	0.665594	0.407	0.057
DAPL1	0	-1.079	0.128	0.497
ITGB6	0	0.822661	0.499	0.093
GRB14	0	-0.733909	0.096	0.38
ITGA6	0	0.83411	0.575	0.133
ITPRID2	0	0.540133	0.586	0.252
TFPI	0	0.570603	0.585	0.294
GULP1	0	0.501973	0.328	0.043
COL3A1	0	1.07856	0.418	0.028
SLC40A1	0	0.921599	0.658	0.287
FN1	0	0.934917	0.357	0.016
IGFBP2	0	1.51266	0.473	0.08
TMBIM1	0	0.849767	0.758	0.341
CCL20	0	1.48527	0.329	0.016
PTMA	0	0.805118	0.999	0.998
MLPH	0	0.981055	0.549	0.034
RAMP1	0	-0.807611	0.524	0.69
BHLHE40	0	1.04992	0.609	0.124
LSM3	0	-0.569493	0.728	0.767
RPL15	0	-0.636975	0.995	0.996
VILL	0	0.665881	0.4	0.022
TRAK1	0	0.514211	0.484	0.154
CDCP1	0	0.522108	0.387	0.037
SHISA5	0	0.550515	0.586	0.192
GPX1	0	0.857555	0.917	0.683
TKT	0	0.59586	0.598	0.232
FAM3D	0	0.521994	0.247	0.004
CADPS	0	-0.833069	0.101	0.38
FILIP1L	0	-0.866438	0.25	0.483
PLCXD2	0	-0.658292	0.088	0.33
ZBTB20	0	-0.718248	0.43	0.61
CSTA	0	0.92396	0.303	0.007
MUC13	0	1.322	0.427	0.024
HEG1	0	-1.25546	0.128	0.543
MGLL	0	1.35294	0.629	0.034
AMOTL2	0	-0.802464	0.179	0.414
CLDN18	0	2.26209	0.484	0.001
FAIM	0	-1.03686	0.379	0.672
RBP1	0	-1.52459	0.388	0.927
ATP1B3	0	0.556816	0.455	0.117
PLS1	0	0.589973	0.502	0.135
CPB1	0	-1.69993	0.2	0.683
CP	0	0.803926	0.229	0.003
TM4SF18	0	-0.701082	0.112	0.389
TM4SF4	0	-0.584095	0.54	0.77
WWTR1	0	-1.05536	0.405	0.637
VEPH1	0	-0.697163	0.089	0.364
ARL14	0	0.6448	0.341	0.01
MECOM	0	0.530845	0.324	0.007
SKIL	0	0.535085	0.475	0.129
LIPH	0	0.593227	0.666	0.352
HES1	0	-1.16275	0.683	0.776
FGFR3	0	-1.26108	0.252	0.639
S100P	0	2.83735	0.686	0.001
HS3ST1	0	0.686419	0.37	0.01
SOD3	0	-2.16377	0.378	0.953
RPL9	0	-0.522187	0.995	0.998
OCIAD2	0	1.0098	0.906	0.672
SRD5A3	0	0.747062	0.465	0.097
NMU	0	0.525706	0.185	0
IGFBP7	0	-1.14928	0.872	0.969
UGT2A3	0	-1.67162	0.271	0.805
SLC4A4	0	-3.04024	0.429	0.994
RASSF6	0	0.571489	0.378	0.044
CXCL5	0	1.46287	0.294	0.003
SCD5	0	-1.05076	0.195	0.6
PLAC8	0	1.55117	0.473	0.004
ARHGAP24	0	-0.647221	0.212	0.413
SPP1	0	0.521529	0.698	0.869
PDE5A	0	-0.589719	0.138	0.338
RPS3A	0	-0.676307	0.993	0.995
GUCY1A1	0	-0.653656	0.131	0.373
NPY1R	0	-1.04392	0.062	0.403
CPE	0	-0.719404	0.236	0.481
ANXA10	0	1.24965	0.441	0.006
HPGD	0	0.618537	0.303	0.009
SPCS3	0	0.520468	0.502	0.131
PDLIM3	0	-1.14418	0.112	0.489
SORBS2	0	-1.57866	0.526	0.917
CTNND2	0	-0.501458	0.059	0.268
DAB2	0	-1.1407	0.271	0.617
C6	0	-0.866479	0.131	0.479
SELENOP	0	-0.847992	0.606	0.799
CCL28	0	0.617523	0.353	0.066
ITGA2	0	0.716232	0.492	0.099
ENC1	0	-1.07893	0.327	0.533
PDE8B	0	-0.642671	0.044	0.289
TMEM167A	0	0.660576	0.654	0.251
COX7C	0	-0.501115	0.992	0.995
RHOBTB3	0	-1.35656	0.254	0.678
GLRX	0	0.540317	0.412	0.102
CAST	0	0.692972	0.802	0.439
CDO1	0	-0.621603	0.045	0.288
SLC12A2	0	0.753093	0.499	0.127
PDLIM4	0	0.529762	0.37	0.074
VDAC1	0	0.650528	0.85	0.56
SKP1	0	-0.752456	0.956	0.969
TGFBI	0	0.615218	0.239	0.007
EGR1	0	-1.74457	0.508	0.817
SPINK1	0	3.66063	0.933	0.628
CD74	0	2.38477	0.973	0.648
SPARC	0	0.729432	0.504	0.163
GABRP	0	1.12334	0.325	0.004
DUSP1	0	-2.11845	0.807	0.938
CLTB	0	1.0224	0.825	0.513
PDLIM7	0	0.671152	0.415	0.051
FOXQ1	0	0.614012	0.379	0.029
SERPINB1	0	0.643514	0.682	0.352
GMPR	0	-0.747128	0.185	0.437
ID4	0	-2.1381	0.076	0.688
DCDC2	0	-1.31492	0.2	0.66
GMNN	0	-2.60875	0.353	0.921
SLC17A4	0	-0.808018	0.084	0.393
H4C3	0	-0.890151	0.514	0.667
UBD	0	0.606774	0.299	0.066
HLA-F	0	0.763397	0.561	0.111
HLA-A	0	1.67131	0.993	0.861
HLA-E	0	1.00303	0.893	0.516
TUBB	0	-0.965749	0.762	0.887
SFTA2	0	1.04946	0.566	0.217
MUCL3	0	1.57002	0.288	0.002
HLA-C	0	0.726265	0.984	0.925
HLA-B	0	1.16622	0.988	0.893
LTB	0	0.625341	0.234	0.013
CLIC1	0	1.03341	0.967	0.784
SLC44A4	0	1.03095	0.634	0.103
CFB	0	0.631995	0.45	0.138
HLA-DRA	0	1.88814	0.848	0.3
HLA-DRB1	0	1.74129	0.759	0.235
HLA-DQB1	0	0.94565	0.46	0.06
PSMB8	0	0.607854	0.723	0.331
PSMB9	0	0.859029	0.657	0.192
HLA-DMA	0	0.650861	0.557	0.204
HLA-DPA1	0	0.849545	0.593	0.232
TAPBP	0	0.610185	0.732	0.352
HMGA1	0	1.11133	0.649	0.204
RPS10	0	-0.723286	0.963	0.985
PGC	0	1.51555	0.243	0.01
PKHD1	0	-1.06138	0.15	0.547
EEF1A1	0	-0.768388	1	1
HMGN3	0	-1.26218	0.729	0.925
PNRC1	0	-1.32346	0.738	0.9
AKAP7	0	-1.45996	0.2	0.731
CCN2	0	-2.6838	0.416	0.701
VNN1	0	0.851135	0.393	0.013
ABRACL	0	0.548489	0.464	0.107
SYNE1	0	-0.624296	0.122	0.346
CNKSR3	0	-0.924053	0.181	0.462
GTF2H5	0	-0.852838	0.641	0.77
EZR	0	0.712529	0.85	0.556
RNASET2	0	0.735801	0.646	0.364
RAC1	0	0.721759	0.977	0.895
KDELR2	0	0.811229	0.81	0.431
NDUFA4	0	-0.664952	0.946	0.971
AGR2	0	1.65263	0.843	0.541
AHR	0	0.636301	0.521	0.134
TOMM7	0	-0.543228	0.934	0.948
SKAP2	0	0.717873	0.467	0.037
AQP1	0	-1.68862	0.361	0.89
IGFBP3	0	0.699896	0.276	0.017
CLDN3	0	-0.654086	0.536	0.735
CLDN4	0	1.15638	0.887	0.558
GTF2I	0	-0.673873	0.793	0.817
STEAP1	0	0.5045	0.318	0.01
SAMD9	0	0.592011	0.415	0.112
TFPI2	0	-1.55585	0.131	0.438
GNG11	0	-1.26018	0.35	0.698
COL1A2	0	1.0784	0.408	0.028
SGCE	0	-0.792138	0.186	0.475
PEG10	0	-0.753691	0.129	0.395
SEM1	0	0.528647	0.941	0.803
BRI3	0	0.588208	0.772	0.443
BAIAP2L1	0	0.564968	0.475	0.091
ARPC1B	0	1.04496	0.824	0.411
CYP3A5	0	0.96768	0.684	0.339
AZGP1	0	0.999084	0.409	0.06
PRKAR2B	0	-0.811737	0.065	0.385
TES	0	0.50798	0.547	0.179
CAV2	0	-0.763972	0.679	0.798
MET	0	0.655517	0.43	0.03
CFTR	0	-2.22664	0.37	0.964
CTTNBP2	0	-0.612825	0.065	0.298
FAM3C	0	0.587354	0.699	0.386
AKR1B10	0	0.688245	0.236	0.001
CALD1	0	-0.803163	0.448	0.672
PRSS1	0	-2.63847	0.35	0.901
EPHB6	0	-1.14318	0.173	0.587
TRPV6	0	-0.968234	0.158	0.5
PDIA4	0	0.55329	0.68	0.354
TMEM176B	0	1.37166	0.577	0.067
TMEM176A	0	1.21337	0.533	0.049
AOC1	0	0.559801	0.266	0.001
CD99	0	0.630925	0.702	0.356
ARSL	0	-0.843779	0.254	0.508
SH3KBP1	0	0.549599	0.394	0.047
MAOA	0	-0.870046	0.353	0.59
TIMP1	0	2.16088	0.965	0.46
PLP2	0	0.864878	0.797	0.42
MAGED2	0	-0.702971	0.46	0.599
MAGEH1	0	-0.855949	0.15	0.45
IL2RG	0	0.704392	0.349	0.007
BEX1	0	-2.15539	0.16	0.763
BEX4	0	-0.968611	0.211	0.587
BEX2	0	-0.69693	0.203	0.447
TCEAL9	0	-0.668862	0.611	0.739
BEX3	0	-1.70887	0.525	0.933
TCEAL4	0	-0.746517	0.516	0.697
TSC22D3	0	1.05878	0.744	0.391
IDS	0	0.554195	0.552	0.212
SLC6A8	0	0.672009	0.332	0.016
SSR4	0	0.656093	0.941	0.764
MPP1	0	-0.965132	0.12	0.488
DEFB1	0	-1.53393	0.725	0.986
CLDN23	0	0.527713	0.359	0.1
CTSB	0	1.2265	0.845	0.372
TUSC3	0	-0.77582	0.291	0.561
SLC25A37	0	0.644372	0.621	0.267
ADAM28	0	0.673213	0.435	0.051
CLU	0	-2.61332	0.681	0.999
DUSP4	0	0.572191	0.357	0.022
RAB11FIP1	0	1.21612	0.699	0.216
EIF4EBP1	0	0.809692	0.606	0.232
ADAM9	0	0.787693	0.636	0.187
PLAT	0	1.34495	0.298	0.032
SDR16C5	0	0.607704	0.343	0
ASPH	0	0.5503	0.595	0.279
RPL7	0	-0.739515	0.99	0.994
CA2	0	-1.33212	0.417	0.784
UQCRB	0	-0.665812	0.972	0.99
SDC2	0	-0.617156	0.173	0.384
ERICH5	0	-0.996822	0.235	0.604
YWHAZ	0	0.608114	0.898	0.649
MAL2	0	1.02524	0.809	0.447
NDRG1	0	1.19234	0.554	0.083
PSCA	0	1.37944	0.355	0.002
LY6D	0	1.11445	0.242	0
LY6E	0	1.49465	0.921	0.541
NAPRT	0	0.691868	0.571	0.184
TSTA3	0	1.01596	0.669	0.215
PLEC	0	0.90102	0.644	0.191
SLC39A4	0	0.505799	0.588	0.242
GLIS3	0	-1.01803	0.252	0.575
LURAP1L	0	-1.04338	0.382	0.62
NFIB	0	-0.867927	0.541	0.703
RPS6	0	-0.549961	0.996	0.998
CDKN2A	0	0.706158	0.298	0.023
CA9	0	0.709669	0.314	0.026
TPM2	0	0.719423	0.501	0.158
ALDH1A1	0	-0.928516	0.456	0.732
ANXA1	0	2.18569	0.739	0.127
NTRK2	0	-1.6922	0.124	0.661
GOLM1	0	0.8614	0.722	0.313
CKS2	0	0.670895	0.387	0.039
WNK2	0	-1.00727	0.134	0.504
KLF4	0	0.589141	0.391	0.047
TXN	0	0.944903	0.971	0.874
AMBP	0	-2.43703	0.202	0.916
KIF12	0	-1.17439	0.398	0.754
GSN	0	0.864688	0.786	0.465
PBX3	0	-0.753084	0.115	0.39
LCN2	0	3.92759	0.827	0.071
C9orf16	0	0.590783	0.799	0.5
ASS1	0	0.592017	0.456	0.164
CEL	0	-1.16491	0.084	0.421
CLIC3	0	0.964448	0.425	0.013
NPDC1	0	0.75618	0.584	0.17
AKR1C3	0	1.09662	0.566	0.067
NET1	0	0.694764	0.542	0.149
FRMD4A	0	-0.901941	0.134	0.447
FAM171A1	0	-0.608345	0.144	0.36
JCAD	0	-0.901975	0.102	0.434
NRP1	0	-0.653803	0.192	0.411
RASSF4	0	-0.82571	0.238	0.489
BICC1	0	-1.09369	0.277	0.65
ANAPC16	0	-0.770977	0.773	0.838
DDIT4	0	0.713876	0.826	0.464
COMTD1	0	-0.721488	0.51	0.641
HHEX	0	-1.34775	0.226	0.657
TM9SF3	0	0.517734	0.721	0.401
SFRP5	0	-1.64479	0.206	0.791
SCD	0	0.718103	0.356	0.005
NEURL1	0	-0.634919	0.069	0.318
COL17A1	0	0.746667	0.301	0
SMC3	0	-0.748612	0.405	0.556
PDCD4	0	-1.1829	0.45	0.743
ADRA2A	0	-0.801527	0.25	0.493
FGFR2	0	-0.802736	0.17	0.439
IFITM1	0	1.1444	0.423	0.037
IFITM3	0	0.838187	0.983	0.959
PKP3	0	0.536042	0.579	0.208
CRACR2B	0	0.671508	0.506	0.154
CD151	0	0.671743	0.886	0.617
MUC6	0	-1.23388	0.28	0.734
MUC5AC	0	1.13646	0.322	0.002
MUC5B	0	0.625913	0.211	0.003
CTSD	0	0.850751	0.895	0.624
SYT8	0	1.07545	0.507	0.103
INS	0	-1.58527	0.819	0.991
CD81	0	-0.675698	0.599	0.759
PHLDA2	0	1.76416	0.732	0.105
CAVIN3	0	0.859824	0.463	0.042
RIC3	0	-0.766228	0.17	0.478
SOX6	0	-0.737295	0.17	0.438
SAA1	0	1.68726	0.301	0.001
LDHA	0	2.36669	0.899	0.357
HTATIP2	0	0.728469	0.625	0.184
CD59	0	-0.557107	0.959	0.978
CD82	0	0.857408	0.614	0.164
MDK	0	1.3609	0.858	0.467
SERPING1	0	-0.874861	0.54	0.915
TCN1	0	1.05867	0.298	0.004
SCGB1D2	0	-0.580239	0.02	0.234
AHNAK	0	0.534783	0.772	0.464
WDR74	0	-1.85933	0.445	0.706
PLAAT4	0	0.951779	0.59	0.173
PLAAT3	0	1.54202	0.764	0.174
PPP1R14B	0	0.604876	0.603	0.233
NEAT1	0	1.89163	0.985	0.894
CFL1	0	0.886149	0.985	0.89
CTSF	0	-0.646092	0.184	0.406
POLD4	0	0.690692	0.797	0.464
CDK2AP2	0	0.574105	0.58	0.201
CCND1	0	-1.95187	0.68	0.904
CTTN	0	0.572372	0.731	0.371
CAPN5	0	0.594376	0.369	0.028
CTSC	0	0.99548	0.6	0.13
MMP1	0	1.03305	0.309	0.009
PDGFD	0	-0.918002	0.145	0.511
GUCY1A2	0	-0.752892	0.056	0.338
CRYAB	0	-1.13256	0.149	0.446
IL18	0	0.659218	0.428	0.038
ZBTB16	0	-0.868148	0.167	0.489
NNMT	0	1.7384	0.568	0.058
CADM1	0	-0.773369	0.155	0.447
TAGLN	0	0.57204	0.436	0.142
FXYD2	0	-2.99773	0.388	1
FXYD6-FXYD2	0	-0.602163	0.036	0.274
TMPRSS4	0	0.963073	0.501	0
SLC37A4	0	-0.969379	0.344	0.6
TRIM29	0	0.748565	0.328	0.005
VSIG2	0	1.16959	0.478	0.024
TMEM45B	0	0.60426	0.348	0.019
GAPDH	0	1.19438	0.99	0.952
GPRC5A	0	1.90323	0.684	0.007
HEBP1	0	-0.842456	0.405	0.602
EMP1	0	0.512121	0.464	0.146
PLBD1	0	0.832418	0.529	0.073
ERP27	0	-0.634428	0.123	0.357
ARHGDIB	0	0.749857	0.517	0.089
EPS8	0	0.747729	0.606	0.194
MGST1	0	1.57058	0.616	0.024
PDE3A	0	-0.69501	0.047	0.326
TUBA1A	0	-0.715488	0.341	0.549
TUBA1C	0	0.536631	0.531	0.183
AQP5	0	0.753299	0.283	0.024
LIMA1	0	0.735364	0.613	0.243
METTL7A	0	-1.05134	0.405	0.703
SMAGP	0	0.50774	0.414	0.06
KRT7	0	0.872335	0.863	0.632
PCBP2	0	-0.508292	0.863	0.844
ATP5MC2	0	-0.628826	0.966	0.982
HNRNPA1	0	-0.761131	0.967	0.981
ERBB3	0	0.525269	0.678	0.379
NDUFA4L2	0	0.750576	0.249	0.036
LYZ	0	3.35625	0.868	0.092
RAB3IP	0	-0.763179	0.381	0.567
PHLDA1	0	0.506919	0.366	0.072
LUM	0	0.706053	0.415	0.136
BTG1	0	-1.38586	0.877	0.966
NUDT4	0	-1.18418	0.535	0.732
SLC25A3	0	-0.5287	0.836	0.837
C12orf75	0	-0.765288	0.889	0.946
RPL6	0	-0.858304	0.982	0.996
OAS1	0	0.75759	0.435	0.041
FBXO21	0	-0.968106	0.382	0.653
PEBP1	0	-1.71122	0.841	0.986
HSPB8	0	-0.723838	0.054	0.327
PLA2G1B	0	-1.68685	0.187	0.676
RPL21	0	-0.695495	0.998	0.997
EPSTI1	0	0.76921	0.542	0.114
TSC22D1	0	0.63132	0.761	0.46
ITM2B	0	-0.523838	0.986	0.987
OLFM4	0	2.38335	0.567	0.182
PCDH17	0	-1.07243	0.079	0.468
KLF5	0	1.06224	0.706	0.199
COMMD6	0	-0.786934	0.896	0.942
CLDN10	0	-2.03343	0.643	0.986
DZIP1	0	-0.507836	0.083	0.28
GAS6	0	-0.71601	0.47	0.656
RNASE1	0	1.0195	0.538	0.176
NDRG2	0	-0.817809	0.411	0.62
PSME2	0	0.551906	0.812	0.557
EGLN3	0	0.886049	0.342	0.003
NFKBIA	0	-1.27765	0.748	0.844
ERO1A	0	1.12868	0.631	0.215
LGALS3	0	2.72465	0.905	0.287
CCDC198	0	-0.88411	0.238	0.519
DHRS7	0	-0.73096	0.633	0.728
GPX2	0	2.28613	0.717	0.07
NPC2	0	0.707989	0.878	0.658
FLRT2	0	-1.40491	0.133	0.661
NDUFB1	0	-0.528516	0.899	0.902
IFI27	0	3.43409	0.929	0.42
SERPINA6	0	-0.897008	0.132	0.495
SERPINA4	0	-0.969897	0.241	0.552
SERPINA5	0	-1.68331	0.281	0.861
DLK1	0	-1.01408	0.016	0.181
HSP90AA1	0	-1.21597	0.975	0.981
AMN	0	0.862793	0.439	0.011
INF2	0	0.512567	0.412	0.067
AHNAK2	0	0.70833	0.367	0.004
CRIP1	0	2.28996	0.711	0.053
NOP10	0	0.555312	0.889	0.662
LPCAT4	0	0.946759	0.5	0.069
SRP14	0	-0.519396	0.99	0.992
CCDC9B	0	-0.790518	0.301	0.491
PHGR1	0	2.54652	0.377	0
PDIA3	0	0.590721	0.852	0.586
B2M	0	2.21602	1	0.995
SORD	0	0.515083	0.349	0.041
DUOX2	0	1.26936	0.37	0.005
DUOXA2	0	1.08822	0.253	0
GATM	0	-1.32362	0.582	0.882
C15orf48	0	3.15084	0.734	0.024
SQOR	0	0.502157	0.501	0.156
EID1	0	-0.654797	0.815	0.844
GCNT3	0	1.21955	0.497	0.004
TPM1	0	-0.652	0.929	0.953
PKM	0	1.31292	0.917	0.633
TSPAN3	0	0.921406	0.852	0.526
ABHD17C	0	0.548446	0.37	0.029
HOMER2	0	-1.36852	0.257	0.737
ISG20	0	1.31473	0.573	0.053
ABHD2	0	0.983295	0.708	0.286
IDH2	0	-0.68617	0.444	0.597
CIB1	0	0.511862	0.875	0.657
SELENOS	0	0.508635	0.759	0.455
METRN	0	-0.786758	0.246	0.461
MSLN	0	1.55146	0.585	0.002
RPS2	0	0.950644	0.995	0.98
SLC9A3R2	0	0.500119	0.526	0.2
ZG16B	0	1.07625	0.45	0.005
IL32	0	1.353	0.902	0.47
SMIM22	0	0.891702	0.931	0.759
EMP2	0	0.931987	0.549	0.07
PLA2G10	0	0.795434	0.363	0.002
TMC5	0	1.89029	0.738	0.041
GP2	0	-1.30295	0.15	0.566
MVP	0	0.776051	0.723	0.262
SEZ6L2	0	0.580687	0.506	0.144
ALDOA	0	1.06887	0.963	0.803
SRCAP	0	0.508812	0.618	0.301
MT1E	0	-1.00916	0.74	0.972
MT1F	0	-1.65257	0.585	0.921
ADGRG1	0	0.538146	0.468	0.126
KIFC3	0	-0.745395	0.215	0.438
CKLF	0	0.692528	0.729	0.386
NQO1	0	1.86621	0.71	0.06
GABARAPL2	0	-0.514812	0.832	0.835
COTL1	0	0.891767	0.521	0.042
CYBA	0	0.987688	0.961	0.761
CXCL16	0	0.637991	0.558	0.16
TM4SF5	0	0.667085	0.342	0.005
XAF1	0	0.617778	0.353	0.026
CD68	0	0.609287	0.385	0.015
SAT2	0	-1.20778	0.433	0.753
VAMP2	0	-0.726956	0.662	0.748
RPL26	0	-0.682373	0.993	0.996
UBB	0	-1.08464	0.971	0.989
SNORD3B-1	0	-0.570271	0.028	0.218
SNORD3A	0	-1.50948	0.321	0.639
ALDH3A2	0	-0.772686	0.336	0.548
LGALS9	0	0.783976	0.533	0.052
VTN	0	-1.54509	0.106	0.591
CCL2	0	-2.29912	0.312	0.5
CCL5	0	0.633856	0.276	0.045
PPP1R1B	0	-0.967877	0.431	0.755
IGFBP4	0	0.749207	0.548	0.131
KRT23	0	0.837253	0.282	0.034
KRT19	0	2.67813	0.961	0.615
KRT16	0	0.594465	0.171	0
KRT17	0	1.17261	0.322	0.008
JUP	0	0.942931	0.702	0.277
LINC00671	0	-1.53144	0.088	0.637
GRN	0	0.664627	0.774	0.48
PRR15L	0	0.526854	0.634	0.307
HOXB7	0	0.593306	0.377	0.006
ITGA3	0	0.912029	0.621	0.171
COL1A1	0	1.28603	0.459	0.04
TMEM92	0	0.614225	0.367	0.001
CA4	0	-1.17135	0.089	0.534
APOH	0	-0.576188	0.026	0.251
KCNJ16	0	-1.40553	0.143	0.67
SOX9	0	-0.675173	0.627	0.715
JPT1	0	1.77626	0.824	0.217
ITGB4	0	0.945756	0.615	0.136
ST6GALNAC1	0	0.598516	0.341	0.006
MXRA7	0	-0.665565	0.128	0.363
SYNGR2	0	0.602835	0.785	0.471
LGALS3BP	0	0.610236	0.867	0.61
P4HB	0	0.852199	0.849	0.525
SLC16A3	0	1.09773	0.508	0.013
RIOK3	0	0.558066	0.522	0.208
LAMA3	0	0.809957	0.439	0.056
CHST9	0	-0.620838	0.075	0.331
ATP5F1A	0	-0.83664	0.665	0.789
RPL17	0	-0.685369	0.858	0.927
ONECUT2	0	0.644458	0.519	0.183
CYB5A	0	-0.617397	0.78	0.853
SDCBP2	0	1.25332	0.603	0.025
MACROD2	0	0.717842	0.302	0.062
DSTN	0	-0.61736	0.961	0.963
LINC00261	0	-0.685844	0.132	0.352
CST3	0	1.28849	0.984	0.852
PYGB	0	0.518226	0.434	0.113
RAB5IF	0	0.578932	0.687	0.35
TGM2	0	1.05614	0.462	0.018
PI3	0	1.83358	0.411	0.002
SLPI	0	2.38787	0.893	0.306
WFDC2	0	1.90192	0.819	0.459
CTSA	0	0.507687	0.633	0.304
ZFAS1	0	1.05603	0.904	0.669
BCAS1	0	0.670627	0.366	0.013
MISP	0	0.649761	0.387	0.009
GPX4	0	0.621648	0.89	0.689
ATP5F1D	0	-0.510819	0.868	0.875
CIRBP	0	-1.27932	0.841	0.956
NFIC	0	-0.860094	0.499	0.667
SMIM24	0	1.25906	0.464	0.019
LDLR	0	0.523322	0.477	0.195
PRDX2	0	-0.794354	0.677	0.828
IER2	0	-1.29548	0.72	0.796
KLF2	0	0.756402	0.44	0.118
BST2	0	1.08898	0.685	0.281
PDE4C	0	0.817109	0.373	0.007
ISYNA1	0	-1.70747	0.274	0.782
GRAMD1A	0	0.754861	0.431	0.095
FXYD3	0	4.53833	0.882	0.034
FXYD5	0	2.49967	0.795	0.073
LSR	0	1.64394	0.783	0.318
C19orf33	0	3.49662	0.859	0.062
LGALS4	0	1.4733	0.838	0.587
MIA	0	1.18047	0.329	0.003
CEACAM5	0	1.69646	0.316	0
CEACAM6	0	2.94974	0.619	0.008
CXCL17	0	1.15611	0.283	0.007
CEACAM1	0	0.51466	0.302	0.021
PLAUR	0	1.00394	0.504	0.055
KCNN4	0	0.652891	0.397	0.001
APOE	0	0.736626	0.565	0.222
APOC1	0	0.617013	0.502	0.152
FOSB	0	-1.18554	0.342	0.59
VASP	0	0.59507	0.615	0.235
EMP3	0	0.707015	0.432	0.108
FUT2	0	0.589201	0.368	0.007
FTL	0	1.61669	0.999	0.979
RRAS	0	0.595523	0.481	0.096
MYH14	0	0.599158	0.594	0.243
KLK6	0	0.828375	0.205	0
KLK10	0	0.799194	0.333	0.001
KLK11	0	0.810673	0.367	0.009
TTYH1	0	-1.26503	0.11	0.593
CDC42EP5	0	0.733061	0.487	0.119
TNNT1	0	0.778636	0.266	0
RPL28	0	0.909642	1	0.996
ZNF667-AS1	0	-0.583773	0.076	0.327
IGLL5	0	1.38382	0.409	0.004
APOL1	0	1.21902	0.533	0.027
LGALS1	0	1.12932	0.752	0.436
EIF3L	0	-0.760656	0.623	0.74
RPL3	0	-0.673391	0.993	0.997
SYNGR1	0	-0.671276	0.142	0.411
SMDT1	0	-0.706781	0.739	0.799
RNU12	0	-0.654276	0.069	0.25
BIK	0	0.994465	0.57	0.048
TSPO	0	0.944619	0.939	0.727
TYMP	0	0.927339	0.67	0.245
ATP5PF	0	-0.565258	0.897	0.906
APP	0	-0.885149	0.855	0.905
SOD1	0	-0.602173	0.941	0.96
C21orf62	0	-0.502479	0.063	0.259
SON	0	-0.544205	0.827	0.834
RCAN1	0	-1.46134	0.204	0.461
KCNJ15	0	-1.01233	0.229	0.606
HMGN1	0	-0.564625	0.884	0.899
BACE2	0	0.819341	0.659	0.233
FAM3B	0	-0.631709	0.455	0.645
MX1	0	0.654415	0.42	0.112
TFF3	0	3.65835	0.629	0.035
TFF2	0	3.46249	0.597	0.009
TFF1	0	4.59645	0.69	0.007
CSTB	0	1.61377	0.971	0.808
PTTG1IP	0	0.664242	0.767	0.395
COL18A1	0	-1.3603	0.432	0.802
CTRC	0	-1.98321	0.2	0.739
CELA2A	0	-1.66936	0.062	0.54
CELA3B	0	-1.7086	0.108	0.576
CELA3A	0	-2.02385	0.176	0.73
AMY2A	0	-1.98224	0.073	0.599
CLPS	0	-2.83366	0.182	0.863
CPA2	0	-0.944518	0.116	0.431
CPA1	0	-2.33788	0.171	0.716
HOGA1	0	-0.625487	0.052	0.313
PNLIP	0	-2.41388	0.137	0.778
PNLIPRP1	0	-0.62018	0.07	0.293
MUC15	0	-0.534738	0.06	0.272
CTRB2	0	-0.607771	0.353	0.727
CTRB1	0	-2.58863	0.213	0.86
SYCN	0	-1.97883	0.121	0.652
SNORD3D	0	-0.660977	0.031	0.238
CSRP2	1.27e-307	-0.736087	0.125	0.315
NR5A2	4.45e-301	-0.55489	0.159	0.359
TMEM98	7.19e-301	-0.657085	0.393	0.562
ANGPTL4	1.98e-297	0.572367	0.191	0.016
H2BC12	2.49e-297	0.645362	0.672	0.406
MAGI1	4.02e-297	-0.723958	0.374	0.531
GAMT	1.72e-296	-0.556165	0.196	0.4
ADIRF	1.05e-295	0.861221	0.581	0.305
ANKRD36C	1.75e-295	0.779215	0.379	0.138
SPHK1	2.17e-293	-0.594388	0.185	0.382
PNISR	4.62e-292	-0.560968	0.765	0.773
C3	1.48e-286	0.909748	0.501	0.256
COL27A1	7.46e-286	-0.600969	0.176	0.366
BIRC3	2.85e-285	0.624606	0.674	0.392
RARRES1	3.36e-285	0.564723	0.193	0.019
PTTG1	3.89e-285	0.528832	0.178	0.011
TNFSF10	2.19e-284	0.536956	0.606	0.319
JADE1	8.99e-282	-0.749674	0.332	0.496
PRDX3	8.34e-280	-0.585389	0.641	0.696
CES2	2.81e-279	0.526258	0.388	0.15
COX7A2L	1e-278	-0.544804	0.754	0.763
SEMA6A	2.9e-276	-0.563581	0.164	0.35
SAT1	1.51e-275	0.696041	0.981	0.906
GABARAP	2.66e-274	-0.562502	0.708	0.746
PLPP2	2.51e-273	-0.576605	0.668	0.721
MGP	1.88e-272	0.715066	0.625	0.35
MMP7	3.2e-271	1.44226	0.844	0.774
CREB3L1	2.01e-266	0.553137	0.431	0.196
GSTO1	4.36e-266	-0.602595	0.691	0.729
FOS	1.79e-265	-0.864305	0.874	0.862
PNKD	2.2e-265	-0.561689	0.686	0.713
KLK7	1.26e-264	0.515434	0.143	0
RIC8B	1.64e-264	-0.535588	0.125	0.299
SAA2	1.66e-263	0.577532	0.143	0
ITGB1	1.57e-262	0.56166	0.865	0.63
FRAS1	1.87e-262	-0.509607	0.13	0.306
PRAP1	3.47e-262	0.557953	0.142	0
GSTM3	7.17e-262	-0.675514	0.492	0.599
KLF10	1.62e-260	-0.795332	0.322	0.479
TSPAN6	3.01e-258	-0.627264	0.31	0.478
GINM1	1.53e-256	-0.630859	0.332	0.485
IL1R1	1.84e-251	-0.587954	0.194	0.371
PPY	2.05e-249	0.593113	0.191	0.028
BCAM	2.76e-249	-0.570536	0.308	0.486
AGR3	6.4e-249	0.624421	0.617	0.391
HLA-DRB5	4.06e-247	0.717538	0.18	0.023
ANXA3	2.25e-244	-0.566233	0.661	0.723
DMBT1	5.27e-241	0.571894	0.133	0.001
SPINK4	6.03e-241	1.18032	0.131	0
HADHB	1.88e-240	-0.623723	0.504	0.594
CFAP221	5.88e-237	-0.538496	0.159	0.331
TMEM205	1.68e-235	-0.552032	0.649	0.695
MAP3K21	1.5e-233	-0.517005	0.151	0.315
UGT2B15	8.71e-232	-0.782845	0.095	0.254
MRPL18	8.88e-231	-0.691279	0.579	0.633
TM4SF20	5.18e-226	0.632806	0.124	0
DDX17	3.12e-224	-0.508133	0.794	0.765
HINT2	7.29e-224	-0.586573	0.552	0.618
MORN2	3.89e-221	-0.604887	0.402	0.519
ACAA2	7.23e-221	-0.605929	0.383	0.512
NOTCH2	5.57e-220	-0.612179	0.312	0.455
DUSP23	2.34e-219	0.578298	0.633	0.383
LARP6	6.19e-216	-0.529574	0.215	0.377
CST6	9.09e-215	0.544205	0.201	0.044
ARHGEF40	1.04e-213	-0.572842	0.232	0.395
DCTN3	3.46e-213	-0.584163	0.427	0.536
NBPF15	6.61e-212	-0.738371	0.261	0.409
ARHGAP29	6.88e-212	-0.604071	0.345	0.481
RBP4	2.89e-211	-0.576737	0.139	0.297
WWC1	6.1e-209	-0.588017	0.259	0.405
H1-0	3.16e-208	0.510472	0.681	0.441
KRT13	7.35e-208	1.6542	0.115	0
LMO7	2.47e-207	0.590548	0.71	0.47
SUPT5H	7.15e-207	0.560032	0.511	0.279
BCL7A	1.26e-206	-0.520915	0.193	0.348
NTS	2.69e-204	1.07621	0.113	0
TNFRSF12A	2.08e-203	-0.711075	0.751	0.777
IL20RA	9.79e-202	-0.537836	0.253	0.408
ACADVL	1.09e-201	-0.532527	0.64	0.671
ATF7IP2	1.48e-201	-0.586059	0.268	0.411
CAT	1.95e-201	-0.589598	0.374	0.497
PHLDB1	8.75e-199	-0.531704	0.189	0.339
FTH1	1.4e-197	0.794724	1	0.998
ACSS1	2.21e-196	-0.562631	0.301	0.442
ECHDC2	2.02e-194	-0.578946	0.46	0.544
TNS1	1.46e-190	-0.538045	0.23	0.38
SPRR3	2.62e-189	0.726737	0.105	0
MMP24OS	4.85e-188	-0.502056	0.65	0.663
NDUFAF8	1.04e-183	-0.549444	0.545	0.6
VIM	1.5e-183	0.669078	0.618	0.374
LATS2	9.28e-183	-0.517465	0.167	0.309
FAM133B	7.41e-181	-0.577546	0.611	0.629
ESD	3.47e-180	-0.526619	0.604	0.641
ADM	1.55e-179	0.572881	0.362	0.168
EBPL	2.95e-179	-0.556806	0.512	0.577
ACAA1	8.15e-177	-0.561013	0.496	0.563
MTSS1	2.25e-174	-0.515956	0.232	0.374
CBX5	3.92e-171	-0.542041	0.321	0.44
SPINT2	5.55e-171	0.664231	0.978	0.927
CBX6	6.33e-171	-0.528165	0.226	0.366
MYL6B	3.7e-170	-0.553481	0.357	0.466
MEG3	9.28e-170	-0.59013	0.103	0.232
HNF1B	1.09e-169	-0.508343	0.281	0.418
PTP4A1	1.44e-169	-0.629042	0.593	0.631
DPP7	1.32e-165	-0.52777	0.51	0.575
REG3A	7.42e-164	0.999993	0.18	0.046
PLD1	1.85e-162	-0.514893	0.215	0.345
ZNF22	5.96e-162	-0.520849	0.329	0.444
HEXB	7.66e-162	-0.559403	0.59	0.624
TUBB4B	8.69e-162	-0.551969	0.635	0.657
CTSL	4.25e-160	-0.519733	0.484	0.561
ACAT1	4.68e-156	-0.514064	0.27	0.394
H1-2	1.59e-155	0.569669	0.676	0.473
CPEB4	3.43e-154	-0.522136	0.294	0.412
RGCC	4.57e-153	-0.654019	0.273	0.399
FAM200B	9.16e-145	-0.530334	0.45	0.519
LMBRD1	1.81e-141	-0.521723	0.418	0.494
FOXA2	7.96e-141	-0.5272	0.239	0.359
DECR1	1.05e-140	-0.517737	0.483	0.541
GSTM4	8.14e-137	-0.503905	0.268	0.382
CYSTM1	4.1e-131	0.638113	0.939	0.89
TRIP11	8.07e-131	-0.536604	0.35	0.441
MRPS28	1.33e-130	-0.513776	0.361	0.445
AFDN	4.43e-127	-0.532164	0.487	0.534
DNAJA1	1.68e-118	-0.665863	0.61	0.606
HSPA1A	1.6e-113	-1.90863	0.713	0.708
C6orf62	2.01e-113	-0.501516	0.465	0.512
TSPAN8	6.33e-113	0.715231	0.903	0.88
TCP1	8.6e-104	-0.514331	0.491	0.523
ENO1	2.95e-103	0.619112	0.862	0.756
STK17A	6.9e-102	-0.51796	0.367	0.437
SERPINA1	6.85e-97	1.5089	0.778	0.706
MYADM	1.28e-91	-0.600225	0.406	0.461
NUPR1	5.12e-86	0.698229	0.482	0.333
COX6B1	6.51e-82	0.56166	0.984	0.96
GADD45B	9.72e-59	-0.628415	0.447	0.471
CYTOR	1.35e-58	-0.63341	0.552	0.542
ATF3	1.47e-37	-0.650892	0.376	0.398
HSPA1B	4.13e-24	-1.57756	0.505	0.485
RPS16	9.56e-23	0.683201	0.998	0.996
KLF6	1.08e-22	-0.57815	0.856	0.762
REG1A	3.01e-19	1.88941	0.587	0.56
HSPH1	8.15e-18	-1.04158	0.446	0.32
CXCL1	1.45e-16	-1.10995	0.316	0.328
ZFP36	3.15e-15	0.568575	0.868	0.725
DNAJB1	4.29e-07	-1.23736	0.583	0.496
FSTL3	0.0030455	-0.816115	0.276	0.263
